# Supplementary material
Source: publisher figshare collection journal article supplement (https://acs.figshare.com/ndownloader/files/4669426)

# First Total Syntheses and Spectral Data Corrections of 11- $\alpha$ -Methoxycurvularin and 11- $\beta$ - Methoxycurvularin

Qiren Liang,<sup>†</sup> Yongquan Sun,<sup>†</sup> Binxun Yu,<sup>†</sup> Xuegong She,<sup>\*,†,‡</sup> and Xinfu Pan<sup>\*,†</sup>

<sup>†</sup> Department of Chemistry, State Key Laboratory of Applied Organic Chemistry, Lanzhou University,  
Lanzhou, 730000, P. R. China

<sup>‡</sup> State Key Laboratory for Oxo Synthesis and Selective Oxidation, Lanzhou Institute of Chemical  
Physics, Chinese Academy of Sciences, Lanzhou 730000, P. R. China

shexg@lzu.edu.cn

<sup>†</sup> Lanzhou University

<sup>‡</sup> Chinese Academy of Science

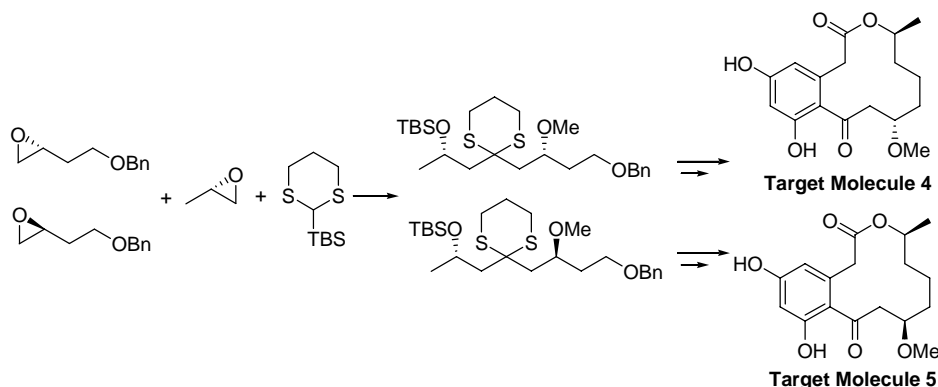

# Table of Contents

## 1. Experimental Procedures and Spectroscopic and Analytical Data of the Products

|                                                        |       |
|--------------------------------------------------------|-------|
| Note.....                                              | S4    |
| Syntheses of Compounds <b>7a</b> and <b>7b</b> .....   | S4-S5 |
| Syntheses of Compounds <b>11a</b> and <b>11b</b> ..... | S5    |
| Syntheses of Compounds <b>13a</b> and <b>13b</b> ..... | S6-S7 |
| Syntheses of Compounds <b>14a</b> and <b>14b</b> ..... | S7    |
| Syntheses of Compounds <b>15a</b> and <b>15b</b> ..... | S7-S8 |

## 2. Copies of NMR Spectra of the Products

|                                                         |     |
|---------------------------------------------------------|-----|
| <sup>1</sup> HNMR Spectra of <b>7a</b> .....            | S9  |
| <sup>13</sup> CNMR Spectra of <b>7a</b> .....           | S10 |
| <sup>1</sup> HNMR Spectra of Compound <b>10a</b> .....  | S11 |
| <sup>13</sup> CNMR Spectra of Compound <b>10a</b> ..... | S12 |
| DEPT Spectra of Compound <b>10a</b> .....               | S13 |
| <sup>1</sup> HNMR Spectra of Compound <b>11a</b> .....  | S14 |
| <sup>13</sup> CNMR Spectra of Compound <b>11a</b> ..... | S15 |
| <sup>1</sup> HNMR Spectra of Compound <b>13a</b> .....  | S16 |
| <sup>13</sup> CNMR Spectra of Compound <b>13a</b> ..... | S17 |
| <sup>1</sup> HNMR Spectra of Compound <b>14a</b> .....  | S18 |
| <sup>13</sup> CNMR Spectra of Compound <b>14a</b> ..... | S19 |
| <sup>1</sup> HNMR Spectra of Compound <b>15a</b> .....  | S20 |
| <sup>13</sup> CNMR Spectra of Compound <b>15a</b> ..... | S21 |
| <sup>1</sup> HNMR Spectra of Compound <b>16a</b> .....  | S22 |
| <sup>13</sup> CNMR Spectra of Compound <b>16a</b> ..... | S23 |
| <sup>1</sup> HNMR Spectra of Compound <b>4</b> .....    | S24 |
| <sup>13</sup> CNMR Spectra of Compound <b>4</b> .....   | S25 |

|                                                         |     |
|---------------------------------------------------------|-----|
| DEPT Spectra of Compound <b>4</b> .....                 | S26 |
| <sup>1</sup> HNMR Spectra of Compound <b>7b</b> .....   | S27 |
| <sup>13</sup> CNMR Spectra of Compound <b>7b</b> .....  | S28 |
| <sup>1</sup> HNMR Spectra of Compound <b>10b</b> .....  | S29 |
| <sup>13</sup> CNMR Spectra of Compound <b>10b</b> ..... | S30 |
| DEPT Spectra of Compound <b>10b</b> .....               | S31 |
| <sup>1</sup> HNMR Spectra of Compound <b>11b</b> .....  | S32 |
| <sup>13</sup> CNMR Spectra of Compound <b>11b</b> ..... | S33 |
| <sup>1</sup> HNMR Spectra of Compound <b>13b</b> .....  | S34 |
| <sup>13</sup> CNMR Spectra of Compound <b>13b</b> ..... | S35 |
| DEPT Spectra of Compound <b>13b</b> .....               | S36 |
| <sup>1</sup> HNMR Spectra of Compound <b>14b</b> .....  | S37 |
| <sup>13</sup> CNMR Spectra of Compound <b>14b</b> ..... | S38 |
| <sup>1</sup> HNMR Spectra of Compound <b>15b</b> .....  | S39 |
| <sup>13</sup> CNMR Spectra of Compound <b>15b</b> ..... | S40 |
| <sup>1</sup> HNMR Spectra of Compound <b>16b</b> .....  | S41 |
| <sup>13</sup> CNMR Spectra of Compound <b>16b</b> ..... | S42 |
| <sup>1</sup> HNMR Spectra of Compound <b>5</b> .....    | S43 |
| <sup>13</sup> CNMR Spectra of Compound <b>5</b> .....   | S44 |
| DEPT Spectra of Compound <b>5</b> .....                 | S45 |

## Experimental Procedures and Spectroscopic and Analytical Data of the Products

**Note:** Oxygen- and moisture-sensitive reactions were carried out under argon atmosphere. Solvents were purified and dried by standard methods prior to use. All commercially available reagents were used without further purification unless otherwise noted. Column chromatography was performed on silica gel (200-300 mesh). Optical rotations were measured on a precision automated polarimeter. Infrared spectra were recorded on a FT-IR spectrometer.  $^1\text{H}$ NMR and  $^{13}\text{C}$ NMR spectra were recorded on a 300 MHz and a 400 MHz spectrometers. Chemical shifts are reported as  $\delta$  values relative to internal chloroform ( $\delta$  7.26 for  $^1\text{H}$  and 77.0 for  $^{13}\text{C}$ ).

### Syntheses of (R)-2-(2-(benzyloxy)ethyl)oxirane **7a** and (S)-2-(2-(benzyloxy)ethyl)oxirane **7b**

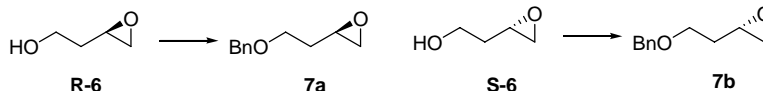

NaH (70%) (2.6 g, 75.7 mmol) was added to the solution of (R)-1,2-Epoxy-4-butanol **6** (3.33 g, 37.8 mmol) in THF (40 mL) at 0 °C, then  $\text{Bu}_4\text{N}^+\text{I}^-$  (10 mg) and BnBr (7.76 g, 45.36 mmol) was added. The solution was warmed to rt and stirred for 2h, quenched with saturated  $\text{NH}_4\text{Cl}$  solution and extracted with ether ( $3 \times 60$  mL), the combined organic solution were washed with brine ( $3 \times 15$  mL), dried ( $\text{Na}_2\text{SO}_4$ ) and concentrated in vacuo. The residue was purified by column chromatography (hexanes / EtOAc, 20:1) to give compound **7a** (6.69 g, 99.3%) as colorless oil:  $[\alpha]_{\text{D}}^{25} +16^\circ$  (C 2.0,  $\text{CHCl}_3$ );  $^1\text{H}$  NMR (300MHz,  $\text{CDCl}_3$ )  $\delta$  7.26-7.39 (m, 5H), 4.54 (s, 2H), 3.64 (td,  $J = 11.1$  Hz, 9.6 Hz, 5.1 Hz, 3.9 Hz, 2H), 3.08 (m, 1H), 2.78 (t,  $J = 4.8$  Hz, 1H), 2.53 (t,  $J = 4.8$  Hz, 1H), 1.87-1.98 (m, 1H), 1.73-1.83 (m, 1H);  $^{13}\text{C}$  NMR (75 MHz,  $\text{CDCl}_3$ )  $\delta$  138.1, 128.3, 127.5, 72.9, 66.9, 49.9, 46.9, 32.8; IR (KBr) 2922, 2860, 1103, 739,  $698\text{cm}^{-1}$ ; HRMS  $m/z$  calcd for  $\text{C}_{11}\text{H}_{14}\text{O}_2$   $[\text{M}+\text{H}]^+$  179.1072 found 179.1070;

**7b** (9.2 g, 98.9%) was obtained from (S)-1,2-Epoxy-4-butanol **6** (4.6 g, 52.3 mmol) and BnBr (10.7 g, 62.8 mmol), by the same operation as the synthesis of **7a**:  $[\alpha]_{\text{D}}^{25} -15^\circ$  (c 2.13,  $\text{CHCl}_3$ );  $^1\text{H}$  NMR (300MHz,  $\text{CDCl}_3$ )  $\delta$  7.26-7.39 (m, 5H), 4.54 (s, 2H), 3.63 (t,  $J = 6.9$  Hz, 2H), 3.07 (d,  $J = 2.4$  Hz, 1H), 2.78 (t,  $J = 4.8$  Hz, 1H), 2.52 (m, 1H), 1.92 (td,  $J = 19.8$  Hz, 6.0 Hz, 1H), 1.78 (td,  $J = 20.1$  Hz, 6.0 Hz, 1H);  $^{13}\text{C}$  NMR (75 MHz,  $\text{CDCl}_3$ )  $\delta$  138.2, 128.3, 127.5, 72.9, 66.9, 49.9, 46.9, 32.8; IR (KBr) 2922,

2860, 1103, 739, 699  $\text{cm}^{-1}$ ; HRMS  $m/z$  calcd for  $\text{C}_{11}\text{H}_{14}\text{O}_2$   $[\text{M}+\text{H}]^+$  179.1072 found 179.1069.

### Syntheses of compounds **11a** and **11b**

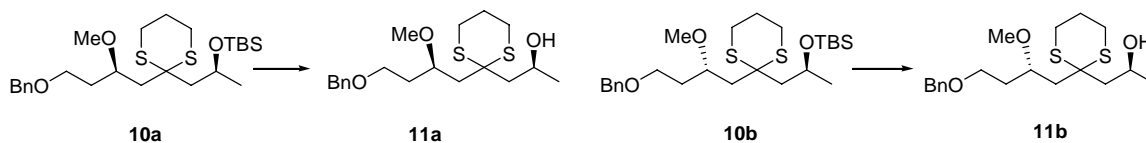

0.5 mL of hydrochloric acid (conc.) was added to a solution of **10a** (1.358 g, 2.8 mmol) in 50 mL of MeOH, and this mixture was stirred for 2 h at rt.  $\text{NaHCO}_3$  (500 mg, 6 mmol) was added. After stirring for 0.5 h, MeOH was removed in vacuo. The residue was dissolved in 150 mL of ether, washed with water ( $3 \times 10$  mL) and brine ( $2 \times 10$  mL), dried ( $\text{Na}_2\text{SO}_4$ ) and concentrated in vacuo. The residue was purified by column chromatography (hexanes / EtOAc, 4:1) to give compound **11a** (1.02 g, 99.2%) as colorless oil:  $[\alpha]_{\text{D}}^{25} -3^\circ$  (c 0.7,  $\text{CHCl}_3$ );  $^1\text{H}$  NMR (300 MHz,  $\text{CDCl}_3$ )  $\delta$  7.24-7.34 (m, 5H), 4.48 (t,  $J = 12.3$  Hz, 2H), 4.16 (t,  $J = 7.2$  Hz, 1H), 3.69 (dd,  $J = 11.7$  Hz, 4.8 Hz, 1H), 3.58 (d,  $J = 3.0$  Hz, 1H), 3.55 (dd,  $J = 7.2$  Hz, 4.8 Hz, 2H), 3.27 (s, 3H), 2.97 (ddd,  $J = 19.8$  Hz, 9.9 Hz, 3.3 Hz, 2H), 2.67-2.89 (m, 2H), 2.13 (d,  $J = 4.8$  Hz, 2H), 1.76-2.03 (m, 6H), 1.14 (d,  $J = 6.3$  Hz, 3H);  $^{13}\text{C}$  NMR (75 MHz,  $\text{CDCl}_3$ )  $\delta$  138.2, 128.2, 127.5, 127.4, 75.1, 72.9, 66.5, 64.9, 56.0, 51.4, 46.3, 44.6, 34.0, 26.3, 25.9, 24.7, 23.4; IR (KBr) 3388, 2923, 1418, 1383, 1118  $\text{cm}^{-1}$ ; HRMS  $m/z$  calcd for  $\text{C}_{19}\text{H}_{30}\text{S}_2\text{O}_3$   $[\text{M}+\text{Na}]^+$  393.1534 found 393.1530;

**10b** (6.7 g, 13.8 mmol) was treated with 100 mL MeOH and 1 mL hydrochloric acid (conc.) by the same operation as the synthesis of **11a** to give **11b** (4.97 g, 97%) as colorless oil:  $[\alpha]_{\text{D}}^{25} +31^\circ$  (c 1.7,  $\text{CHCl}_3$ );  $^1\text{H}$  NMR (300 MHz,  $\text{CDCl}_3$ )  $\delta$  7.25-7.33 (m, 5H), 4.49 (dd,  $J = 13.5$  Hz, 11.7 Hz, 2H), 4.10-4.15 (m, 2H), 3.77 (ddd,  $J = 9.9$  Hz, 4.8 Hz, 1.8 Hz, 1H), 3.57 (t,  $J = 6.0$  Hz, 2H), 3.34 (s, 3H), 2.72 (dd,  $J = 12.0$  Hz, 6.0 Hz, 4H), 2.32 (dd,  $J = 15.0$  Hz, 9.0 Hz, 1H), 2.21 (dd,  $J = 15.0$  Hz, 1.8 Hz, 1H), 2.14 (dd,  $J = 15.0$  Hz, 9.0 Hz, 2H), 1.18-1.94 (m, 4H), 1.17 (d,  $J = 6.0$  Hz, 3H);  $^{13}\text{C}$  NMR (75 MHz,  $\text{CDCl}_3$ )  $\delta$  138.1, 128.3, 127.6, 127.5, 76.5, 73.1, 66.6, 63.7, 56.1, 51.4, 47.3, 42.7, 33.8, 26.0, 25.9, 25.1, 25.0; IR (KBr) 3436, 2929, 1420, 1369, 1113, 740  $\text{cm}^{-1}$ ; HRMS  $m/z$  calcd for  $\text{C}_{19}\text{H}_{30}\text{S}_2\text{O}_3$   $[\text{M}+\text{Na}]^+$  393.1534 found 393.1529.

## Syntheses of compounds **13a** and **13b**

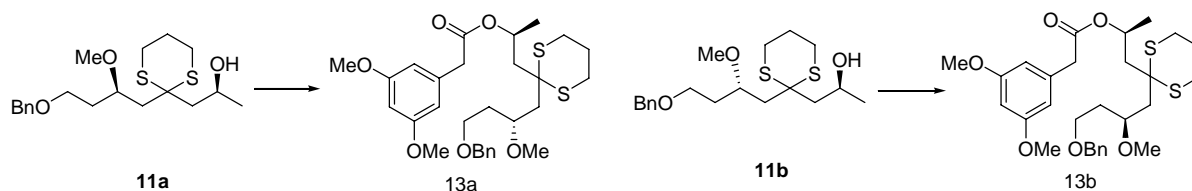

To a solution of **11a** (1.13 g, 3.05 mmol) and 3,5-dimethoxyphenylacetic acid **12** (718 mg, 3.66 mmol) in 30mL of anhydrous ether at rt was added DCC (755 mg, 3.66 mmol) and DMAP (37 mg, 0.3 mmol). After stirred for 3h at rt, the mixture was filtered. The ether solution was dissolved in 100mL of ether and washed with brine ( $3 \times 10$  mL), dried ( $\text{Na}_2\text{SO}_4$ ) and concentrated in vacuo. The residue was purified by column chromatography (hexanes / EtOAc, 10 : 1) to afford the title compound **13a** (1.64 g, 98.2%) as colorless oil:  $[\alpha]_{\text{D}}^{25} -25^\circ$  (c 1.2,  $\text{CHCl}_3$ );  $^1\text{H}$  NMR (300 MHz,  $\text{CDCl}_3$ )  $\delta$  7.27-7.34 (m, 5H), 6.42 (d,  $J = 2.4$  Hz, 2H), 6.33 (d,  $J = 2.4$  Hz, 1H), 5.29 (t,  $J = 6.3$  Hz, 1H), 4.49 (dd,  $J = 14.1$  Hz, 12.0 Hz, 2H), 3.71 (s, 6H), 3.68 (dd,  $J = 6.3$  Hz, 4.8 Hz, 1H), 3.57 (t,  $J = 4.8$  Hz, 2H), 3.50 (s, 2H), 3.27 (s, 3H), 2.63-2.73 (m, 4H), 2.41 (dd,  $J = 15.0$  Hz, 8.4 Hz, 1H), 2.01-2.19 (m, 3H), 1.78-1.91 (m, 4H), 1.20 (d,  $J = 6.6$  Hz, 3H);  $^{13}\text{C}$  NMR (75 MHz,  $\text{CDCl}_3$ )  $\delta$  170.5, 160.5, 138.2, 136.1, 128.2, 127.6, 127.4, 107.3, 99.0, 75.8, 73.0, 68.7, 66.8, 55.9, 55.1, 51.2, 44.2, 43.0, 42.0, 33.8, 26.0, 24.9, 21.2; IR (KBr) 2933, 1731, 1598, 1458, 1295, 1204, 1155, 1066, 742  $\text{cm}^{-1}$ ; HRMS  $m/z$  calcd for  $\text{C}_{29}\text{H}_{40}\text{S}_2\text{O}_6$   $[\text{M}+\text{Na}]^+$  571.2164 found 571.2160.

**11b** (1.47 g, 13.4 mmol) was treated with 3,5-dimethoxyphenylacetic acid **12** (3.414 g, 17.4 mmol), DCC (3.584 g, 17.4 mmol) and DMAP (158 mg, 1.3 mmol) as described for the synthesis of **13a** to give **13b** (7.26 g, 98.6%) as colorless oil:  $[\alpha]_{\text{D}}^{25} -3^\circ$  (c 1.75,  $\text{CHCl}_3$ );  $^1\text{H}$  NMR (300 MHz,  $\text{CDCl}_3$ )  $\delta$  7.26-7.34 (m, 5H), 6.43 (s, 2H), 6.34 (s, 1H), 5.25 (t,  $J = 6.3$  Hz, 1H), 4.47 (d,  $J = 11.7$  Hz, 2H), 3.75 (s, 6H), 3.66 (dd,  $J = 10.5$  Hz, 4.8 Hz, 1H), 3.55 (t,  $J = 6.0$  Hz, 2H), 3.50 (s, 2H), 3.29 (s, 3H), 2.66-2.77 (m, 4H), 2.40 (dd,  $J = 15.3$  Hz, 7.8 Hz, 1H), 2.07 (d,  $J = 5.1$  Hz, 2H), 2.04 (d,  $J = 3.3$  Hz, 1H), 1.76-1.87 (m, 4H), 1.25 (d,  $J = 6.6$  Hz, 3H);  $^{13}\text{C}$  NMR (75 MHz,  $\text{CDCl}_3$ )  $\delta$  170.3, 160.6, 138.3, 136.1, 128.2, 127.6, 127.4, 107.3, 99.0, 75.8, 72.9, 68.8, 66.8, 56.0, 55.2, 51.3, 45.2, 44.7, 41.9, 34.6, 26.3, 26.1, 24.7, 21.7; IR (KBr) 2932, 1731, 1598, 1458, 1295, 1204, 1155, 1065, 741  $\text{cm}^{-1}$ ; HRMS  $m/z$  calcd for  $\text{C}_{29}\text{H}_{40}\text{S}_2\text{O}_6$

$[M+Na]^+$  571.2164 found 571.2161.

### Syntheses of compounds **14a** and **14b**

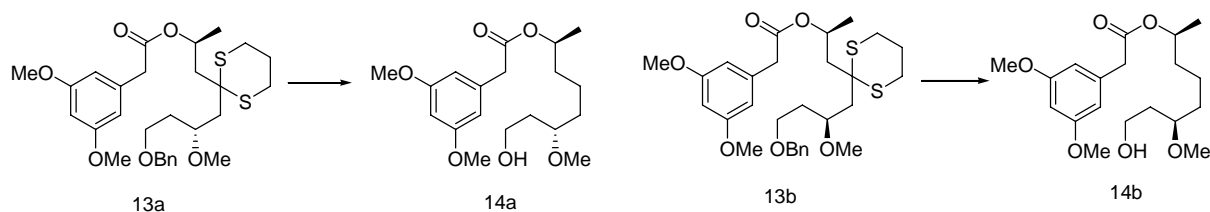

3 g of Raney Ni was added to a solution of **13a** (1.6 g, 2.9 mmol) in 30 mL of EtOH, the mixture was stirred for 4 h at 80 °C under H<sub>2</sub>, then cooled to rt and filtered. The EtOH solution was concentrated in vacuo and the residue was dissolved in 30 mL of EtOH, added 3 g of Raney Ni. The mixture was stirred for another 4 h at 80 °C under H<sub>2</sub>, cooled to rt and filtered, concentrated in vacuo. And the residue was purified by column chromatography (hexanes / EtOAc, 2 : 1) to give compound **14a** (0.78 g, 75.4%) as colorless oil:  $[\alpha]_D^{25} +25^\circ$  (c, 2.38, CHCl<sub>3</sub>); <sup>1</sup>H NMR (300 MHz, CDCl<sub>3</sub>)  $\delta$  6.42 (s, 2H), 6.34 (s, 1H), 4.90 (dd,  $J$  = 12.3 Hz, 6.3 Hz, 1H), 3.76 (s, 6H), 3.69 (dd,  $J$  = 11.1 Hz, 5.4 Hz, 2H), 3.50 (s, 2H), 3.32 (dd,  $J$  = 17.7 Hz, 5.4 Hz, 1H), 3.30 (s, 3H), 2.62 (s, 1H), 1.37-1.67 (m, 6H), 1.27 (dd,  $J$  = 15.9 Hz, 7.2 Hz, 2H), 1.19 (d,  $J$  = 5.7 Hz, 3H); <sup>13</sup>C NMR (75 MHz, CDCl<sub>3</sub>)  $\delta$  170.9, 160.7, 136.3, 107.2, 99.0, 80.5, 71.2, 60.7, 56.4, 55.2, 42.0, 35.9, 35.4, 32.6, 20.7, 19.9; IR (KBr) 3439, 2939, 1728, 1599, 1463, 1294, 1205, 1156, 1063, 837 cm<sup>-1</sup>; HRMS  $m/z$  calcd for C<sub>19</sub>H<sub>30</sub>O<sub>6</sub>  $[M+H]^+$  355.2121 found 355.2118.

**14b** (1.47 g, 76%) was obtained as colorless oil by treatment of **13b** (3.0 g, 5.47 mmol) with Raney Ni under H<sub>2</sub> by the same operation as the synthesis of **14a**:  $[\alpha]_D^{25} -5^\circ$  (c 1.15, CHCl<sub>3</sub>); <sup>1</sup>H NMR (300 MHz, CDCl<sub>3</sub>)  $\delta$  6.42 (d,  $J$  = 2.4 Hz, 2H), 6.34 (t,  $J$  = 2.4 Hz, 1H), 4.90 (dd,  $J$  = 12.9 Hz, 6.3 Hz, 1H), 3.76 (s, 6H), 3.70 (dd,  $J$  = 11.1 Hz, 6.3 Hz, 2H), 3.50 (s, 2H), 3.32 (dd,  $J$  = 14.7 Hz, 6.0 Hz, 1H), 3.30 (s, 3H), 2.58 (s, 1H), 1.33-1.67 (m, 6H), 1.21-1.30 (m, 2H), 1.19 (d,  $J$  = 5.7 Hz, 3H); <sup>13</sup>C NMR (75 MHz, CDCl<sub>3</sub>)  $\delta$  170.9, 160.7, 136.3, 107.2, 99.0, 80.5, 71.2, 60.8, 56.4, 55.2, 42.0, 35.9, 35.4, 32.6, 20.7, 19.9; IR (KBr) 3442, 2939, 1728, 1599, 1463, 1294, 1205, 1156, 1063, 837 cm<sup>-1</sup>; HRMS  $m/z$  calcd for C<sub>19</sub>H<sub>30</sub>O<sub>6</sub>  $[M+H]^+$  355.2121 found 355.2116.

### Syntheses of compounds **15a** and **15b**

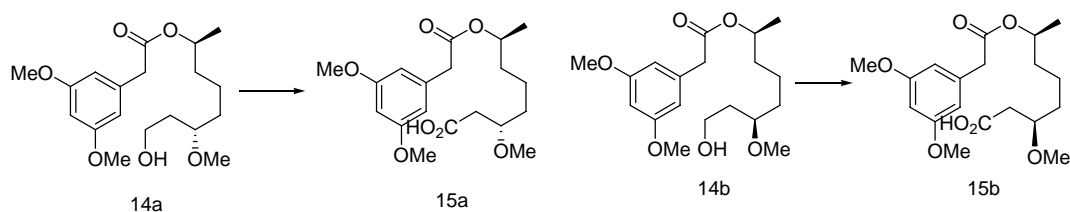

To a solution of **14a** (700 mg, 1.98 mmol) in acetone (50 mL) was added Jones reagent 2.8 mL at 0 °C and the mixture was stirred at the same temperature for 15 min. Isopropyl alcohol was added and the resulting mixture was filtered, concentrated in vacuo, the residue was dissolved in 150mL of EtOAc, washed with brine (3 × 15 mL), dried (Na<sub>2</sub>SO<sub>4</sub>) and concentrated in vacuo. The residue was purified by column chromatography (hexanes / EtOAc / HOAc, 80:20:1) to afford the acid **15a** (634 mg, 86%) as colorless oil:  $[\alpha]_D^{25} +11^\circ$  (c 1.1, CHCl<sub>3</sub>); <sup>1</sup>H NMR (300 MHz, CDCl<sub>3</sub>) δ 6.43 (d, *J* = 2.4 Hz, 2H), 6.36 (d, *J* = 2.4 Hz, 1H), 4.91 (dd, *J* = 12.3 Hz, 6.0 Hz, 1H), 3.77 (s, 6H), 3.58 (dd, *J* = 12.3 Hz, 6.0 Hz, 1H), 3.51 (s, 2H), 3.34 (s, 3H), 2.45 (ddd, *J* = 15.3 Hz, 6.9 Hz, 5.4 Hz, 2H), 1.38-1.64 (m, 4H), 1.25-1.36 (m, 2H), 1.20 (d, *J* = 6.6 Hz, 3H); <sup>13</sup>C NMR (75 MHz, CDCl<sub>3</sub>) δ 176.8, 171.0, 167.1, 160.7, 136.3, 107.2, 99.0, 77.4, 71.2, 56.9, 55.2, 42.0, 38.9, 35.7, 33.3, 20.7, 19.8; IR (KBr) 2939, 1730, 1599, 1463, 1294, 1205, 1157, 1065, 835 cm<sup>-1</sup>; HRMS *m/z* calcd for C<sub>19</sub>H<sub>28</sub>O<sub>7</sub> [M+H]<sup>+</sup> 369.1913 found 369.1910.

**15b** (1.267 g, 87%) was obtained as colorless oil by treatment of **14b** (1.4 g, 3.95 mmol) with 5mL of Jones reagent as the same operation for the synthesis of **15a**:  $[\alpha]_D^{25} +10^\circ$  (c 1.0, CHCl<sub>3</sub>); <sup>1</sup>H NMR (300 MHz, CDCl<sub>3</sub>) δ 6.43 (s, 2H), 6.36 (s, 1H), 4.91 (dd, *J* = 12.3 Hz, 6.6 Hz, 1H), 3.77 (s, 6H), 3.57 (dd, *J* = 12.3 Hz, 5.7 Hz, 1H), 3.51 (s, 2H), 3.33 (s, 3H), 2.51 (dd, *J* = 15.9 Hz, 6.9 Hz, 1H), 2.40 (dd, *J* = 15.9 Hz, 4.8 Hz, 1H), 1.40-1.64 (m, 4H), 1.25-1.35 (m, 2H), 1.20 (d, *J* = 6.6 Hz, 3H); <sup>13</sup>C NMR (75 MHz, CDCl<sub>3</sub>) δ 176.7, 171.0, 167.2, 160.7, 136.3, 107.2, 99.0, 77.4, 71.2, 56.9, 55.2, 42.0, 38.9, 35.7, 33.3, 20.8, 19.9; IR (KBr) 2937 1729, 1598, 1461, 1294, 1205, 1156, 1065, 835 cm<sup>-1</sup>; HRMS *m/z* calcd for C<sub>19</sub>H<sub>28</sub>O<sub>7</sub> [M+H]<sup>+</sup> 369.1913 found 369.1915.



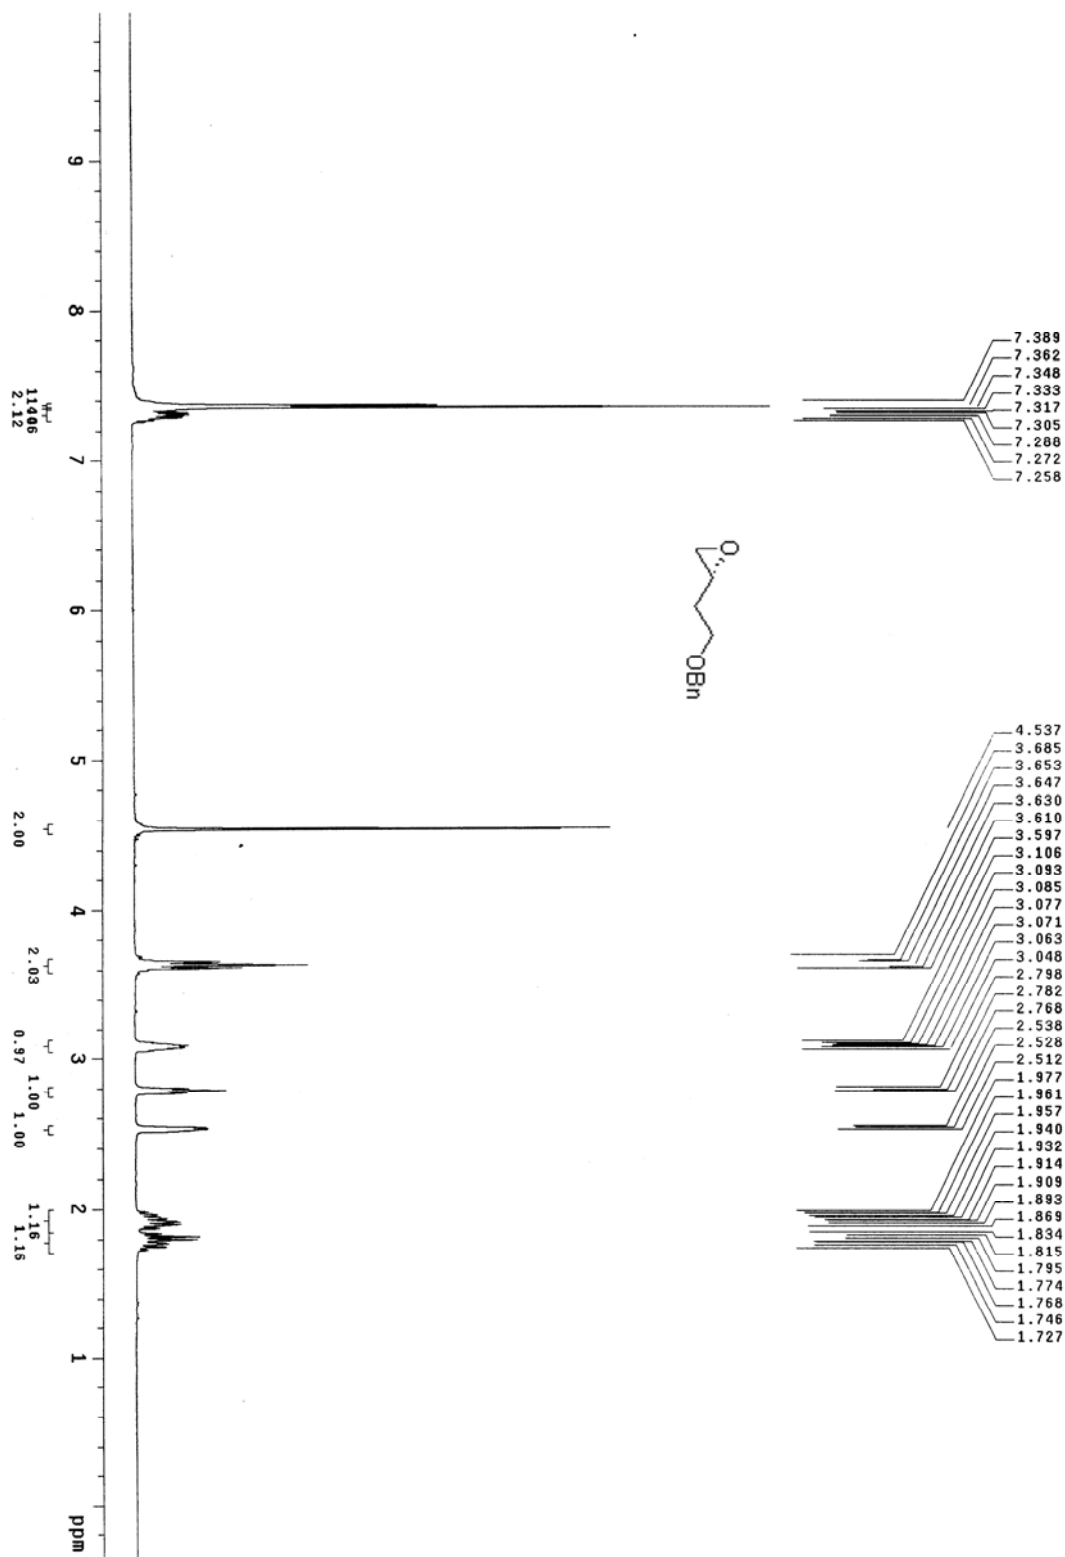

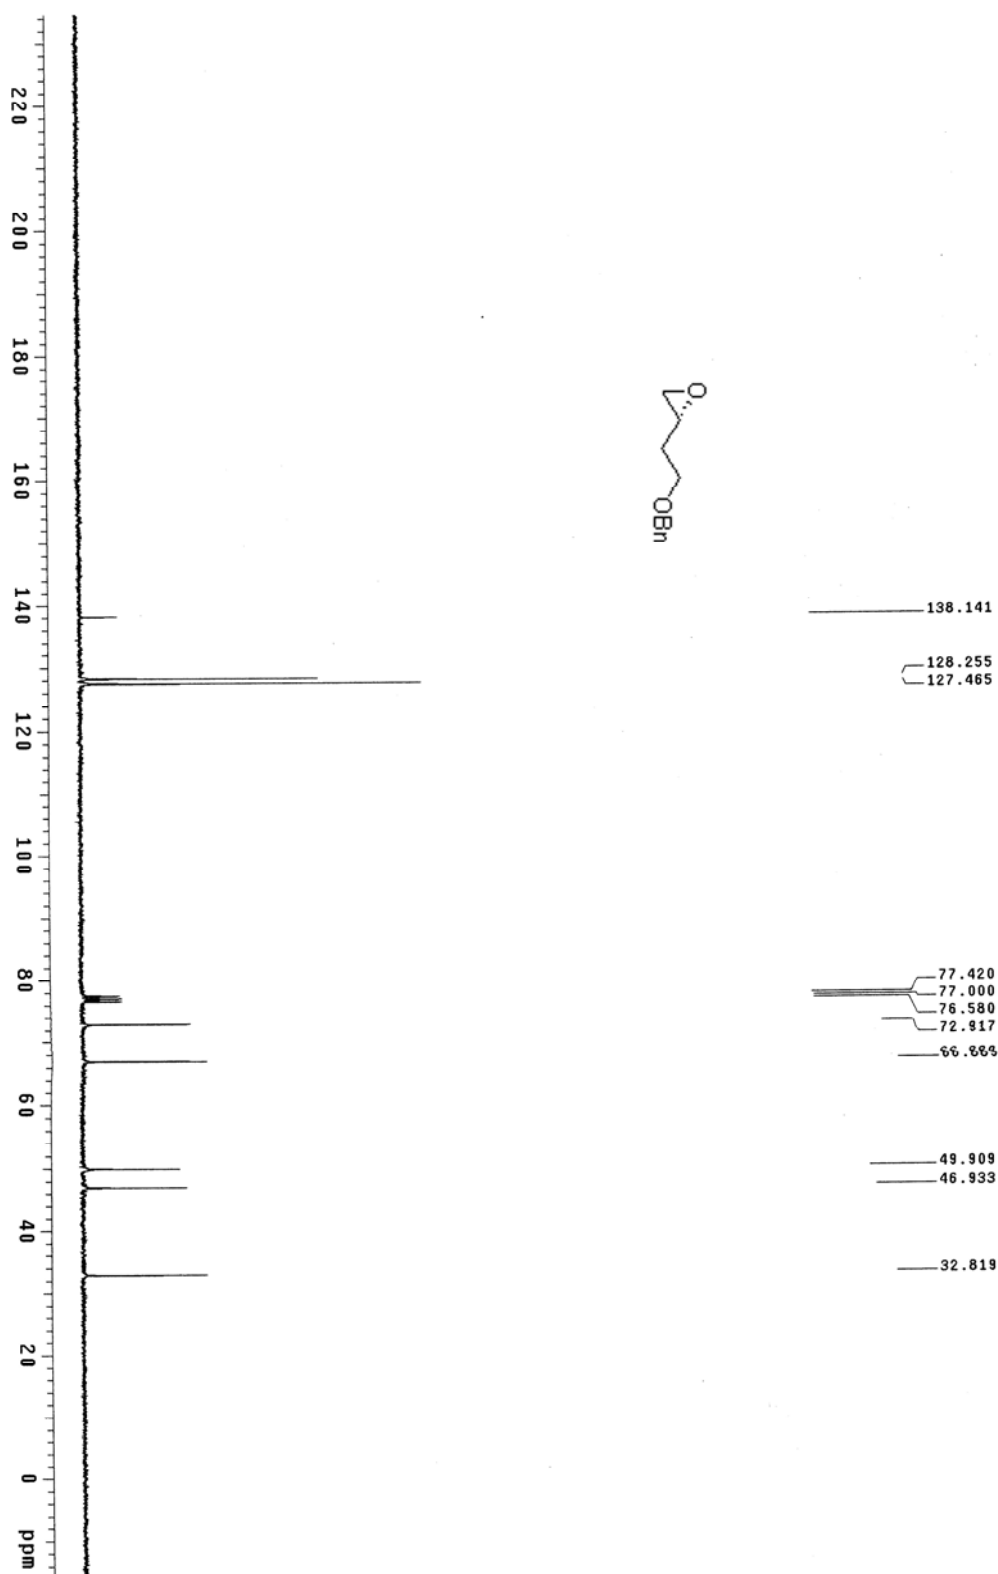

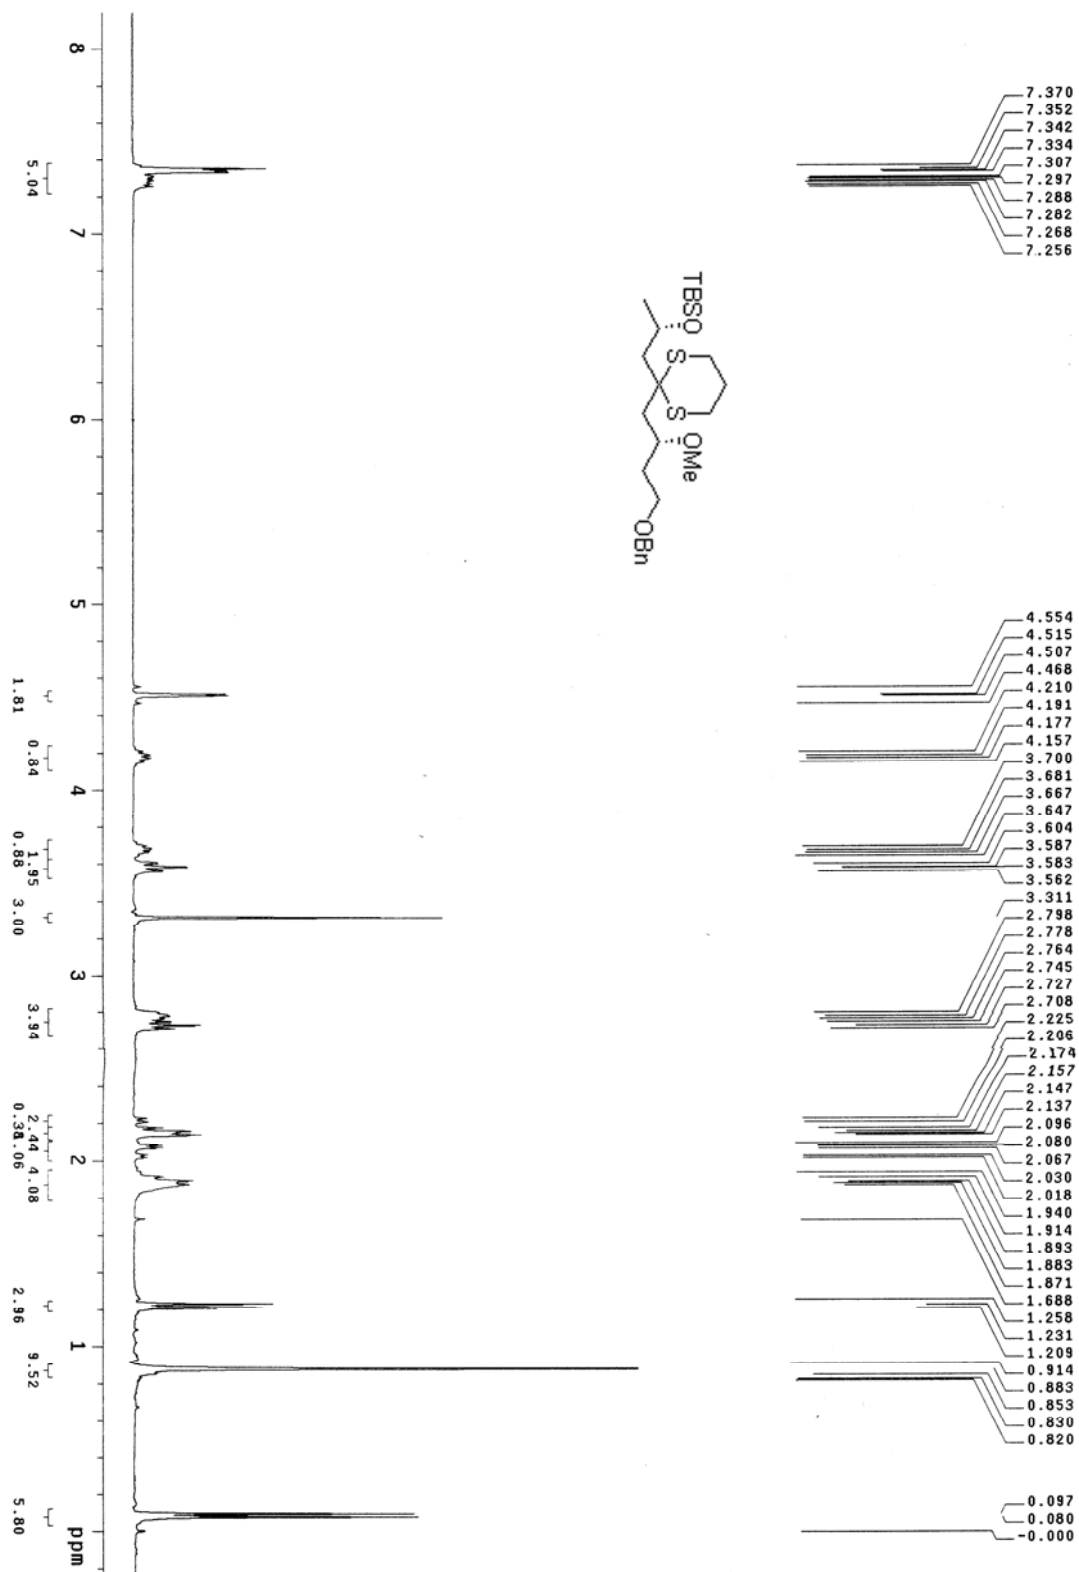

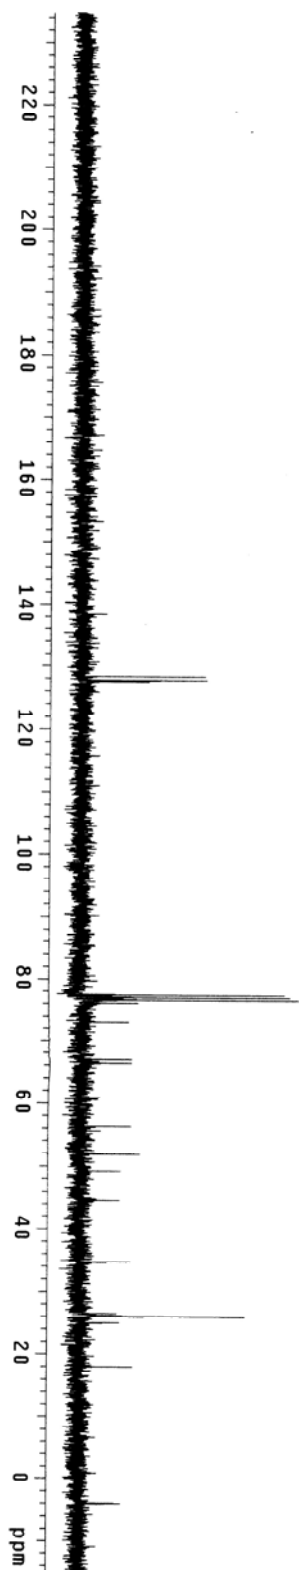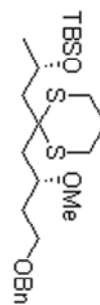

|         |
|---------|
| 128.282 |
| 127.652 |
| 127.465 |
| 77.420  |
| 76.996  |
| 76.573  |
| 76.038  |
| 73.016  |
| 66.896  |
| 66.290  |
| 56.274  |
| 51.905  |
| 49.161  |
| 44.579  |
| 34.647  |
| 26.428  |
| 26.119  |
| 26.012  |
| 24.997  |
| 17.961  |
| -3.971  |
| -4.124  |



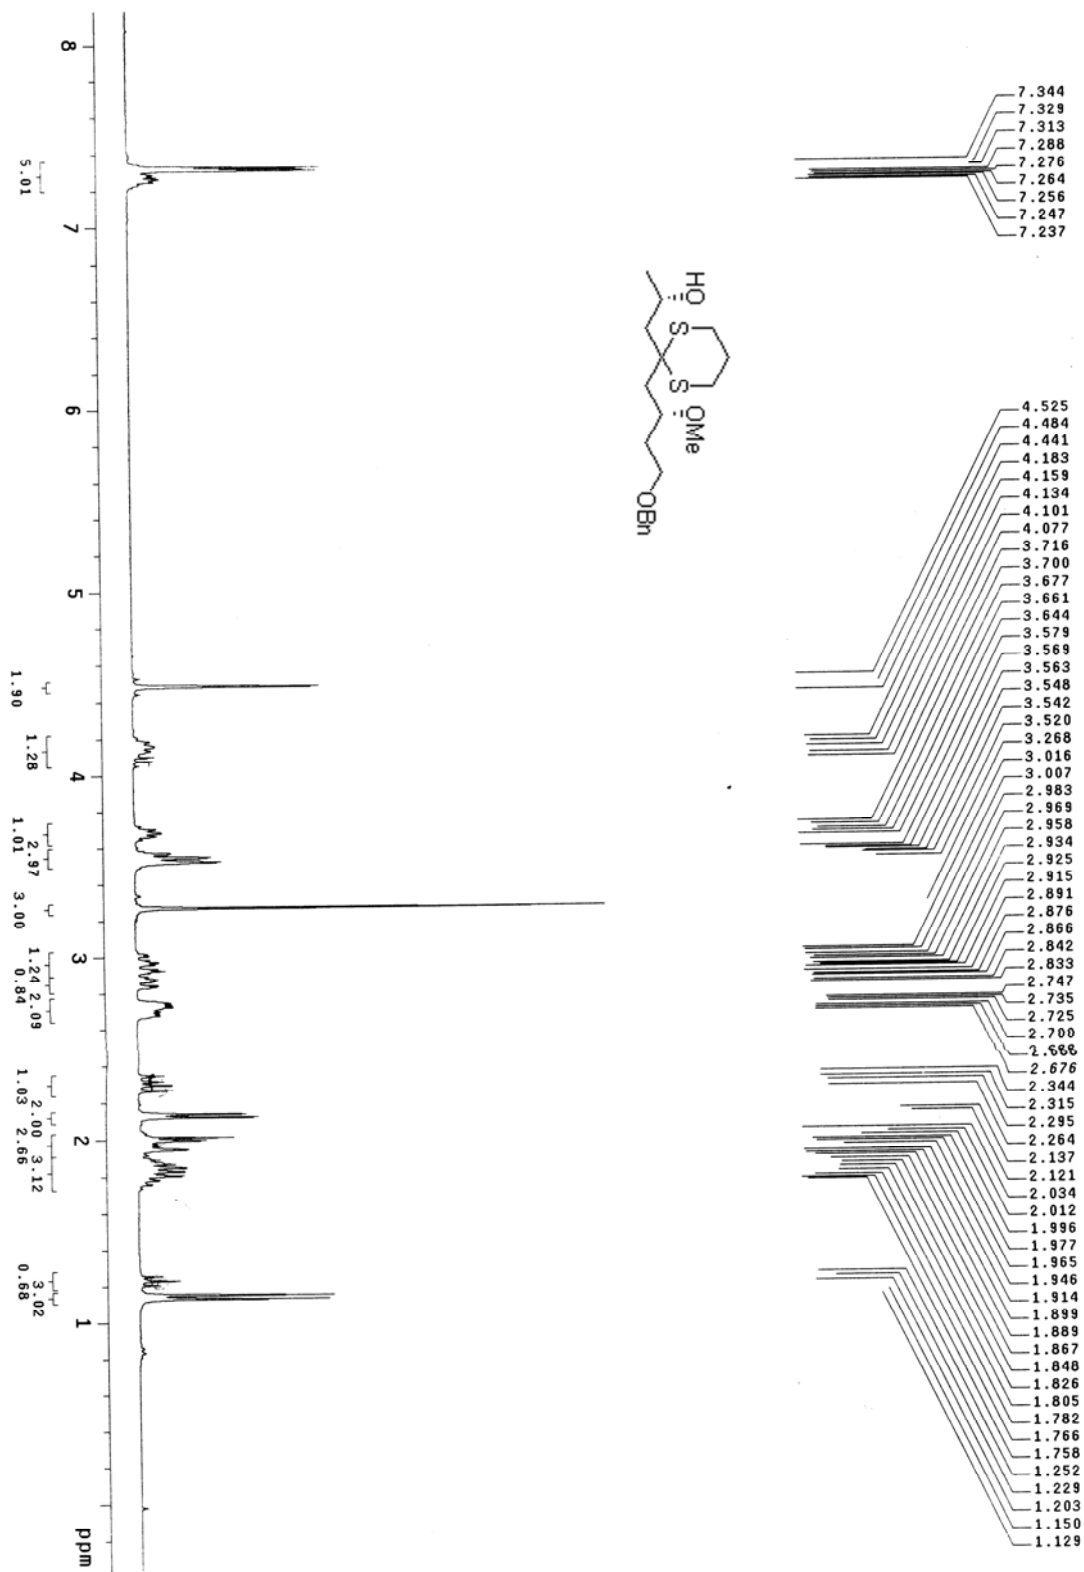

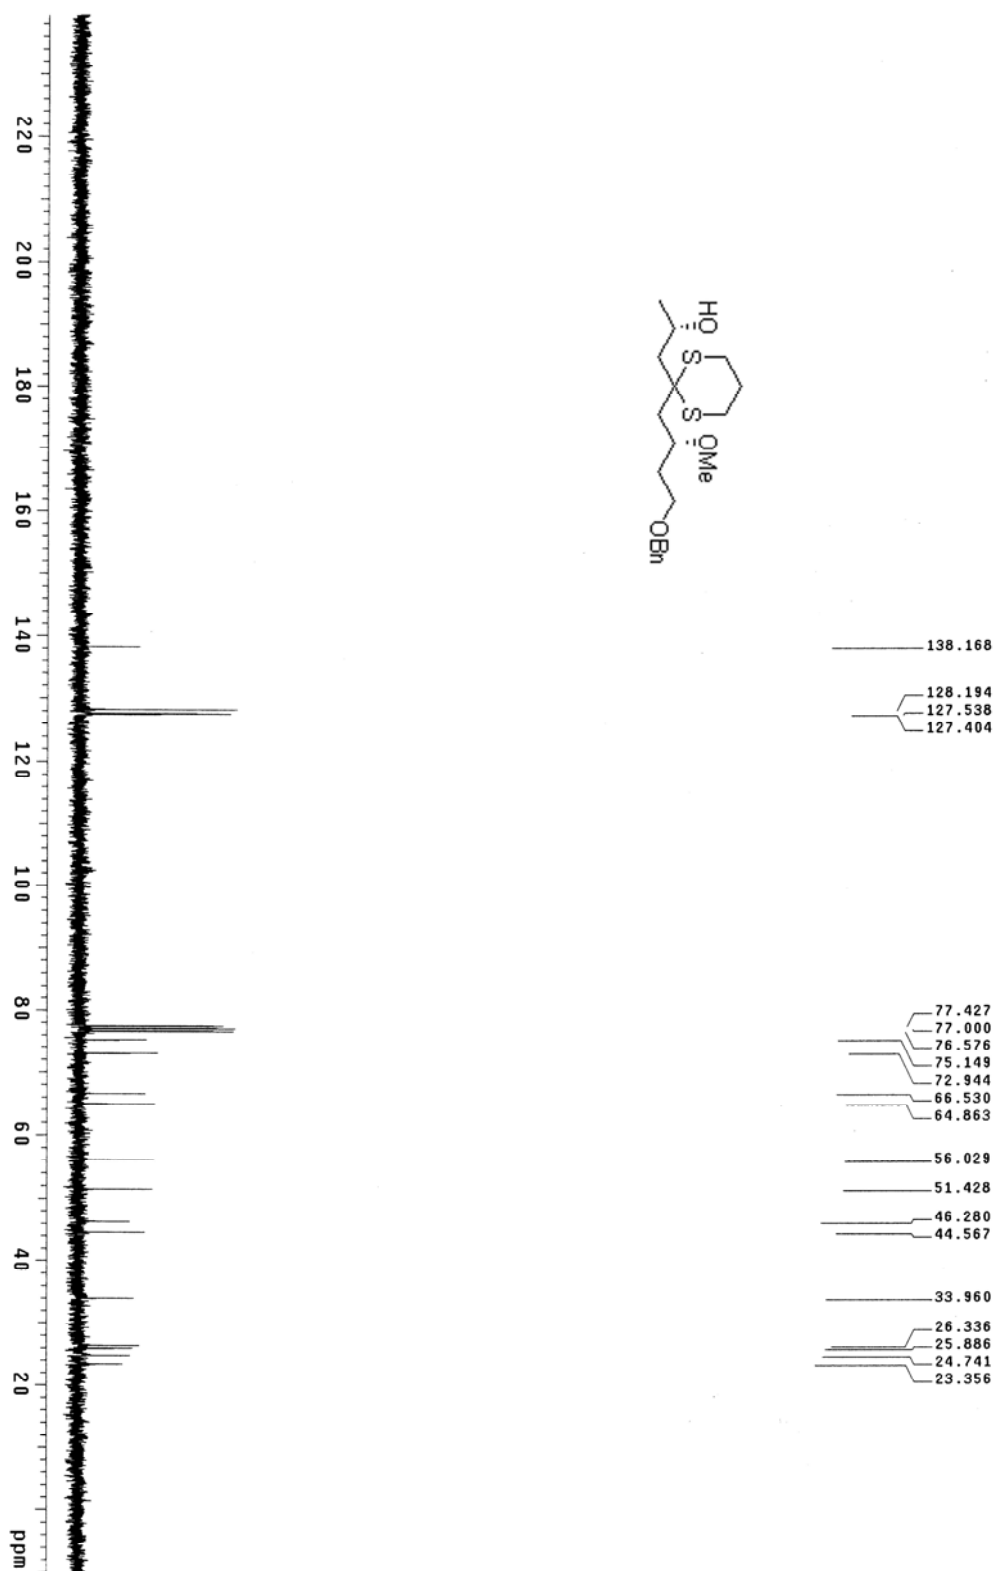

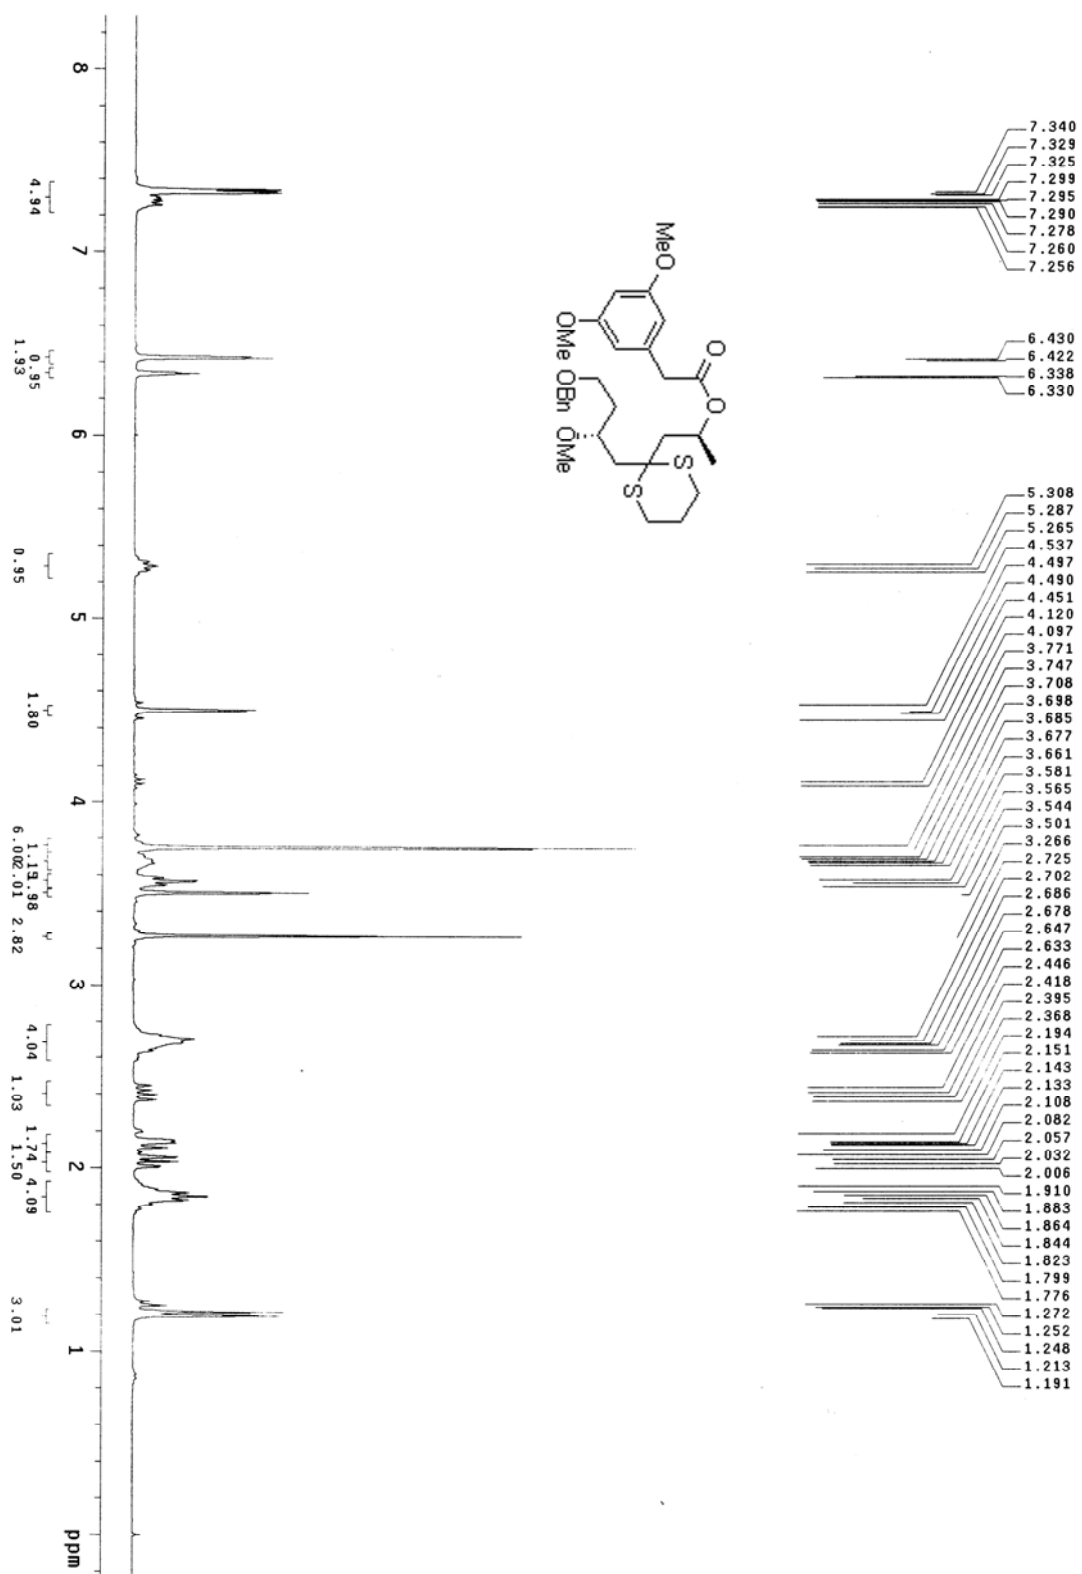



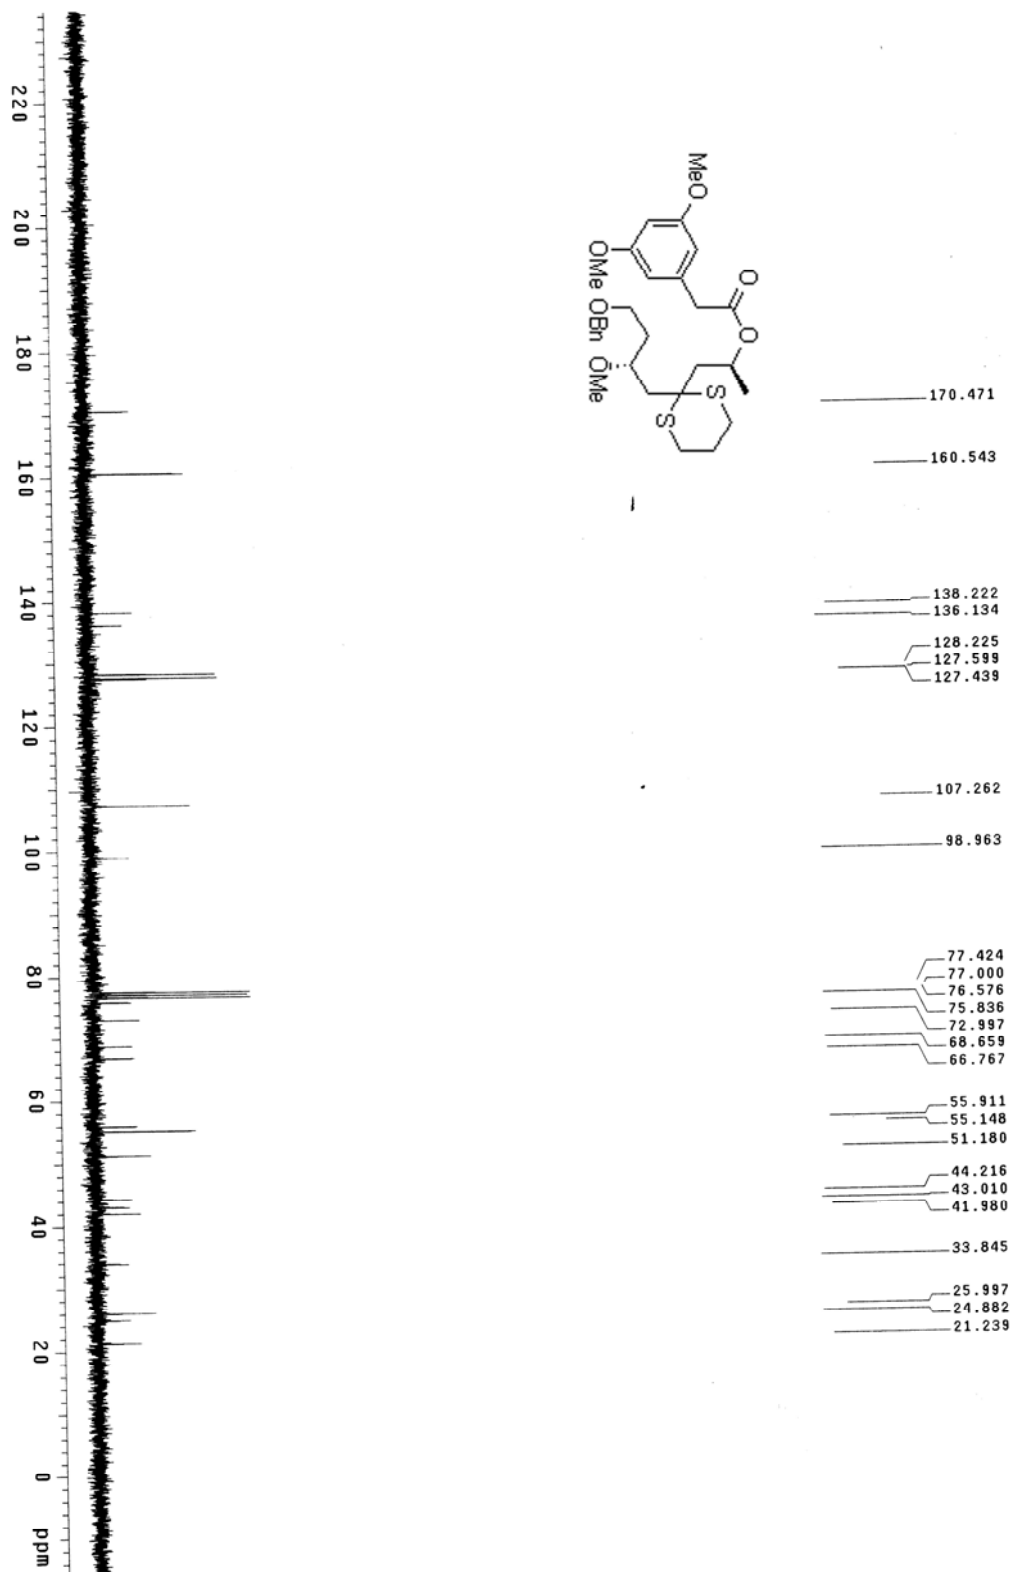

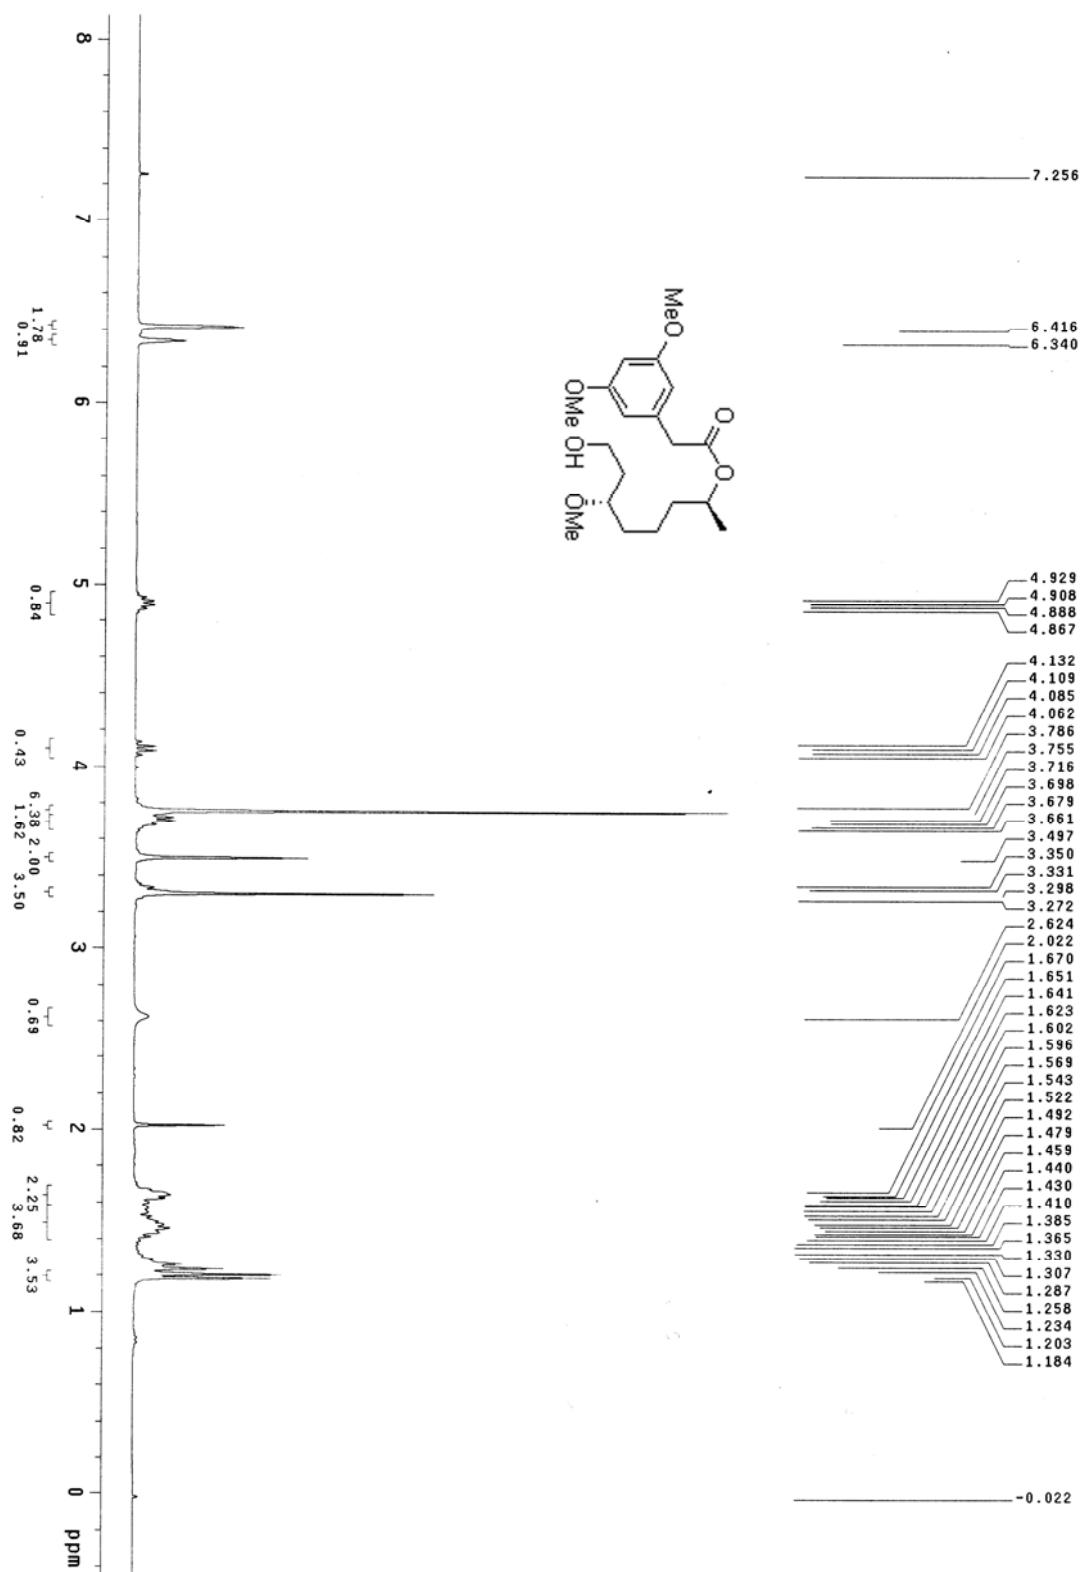

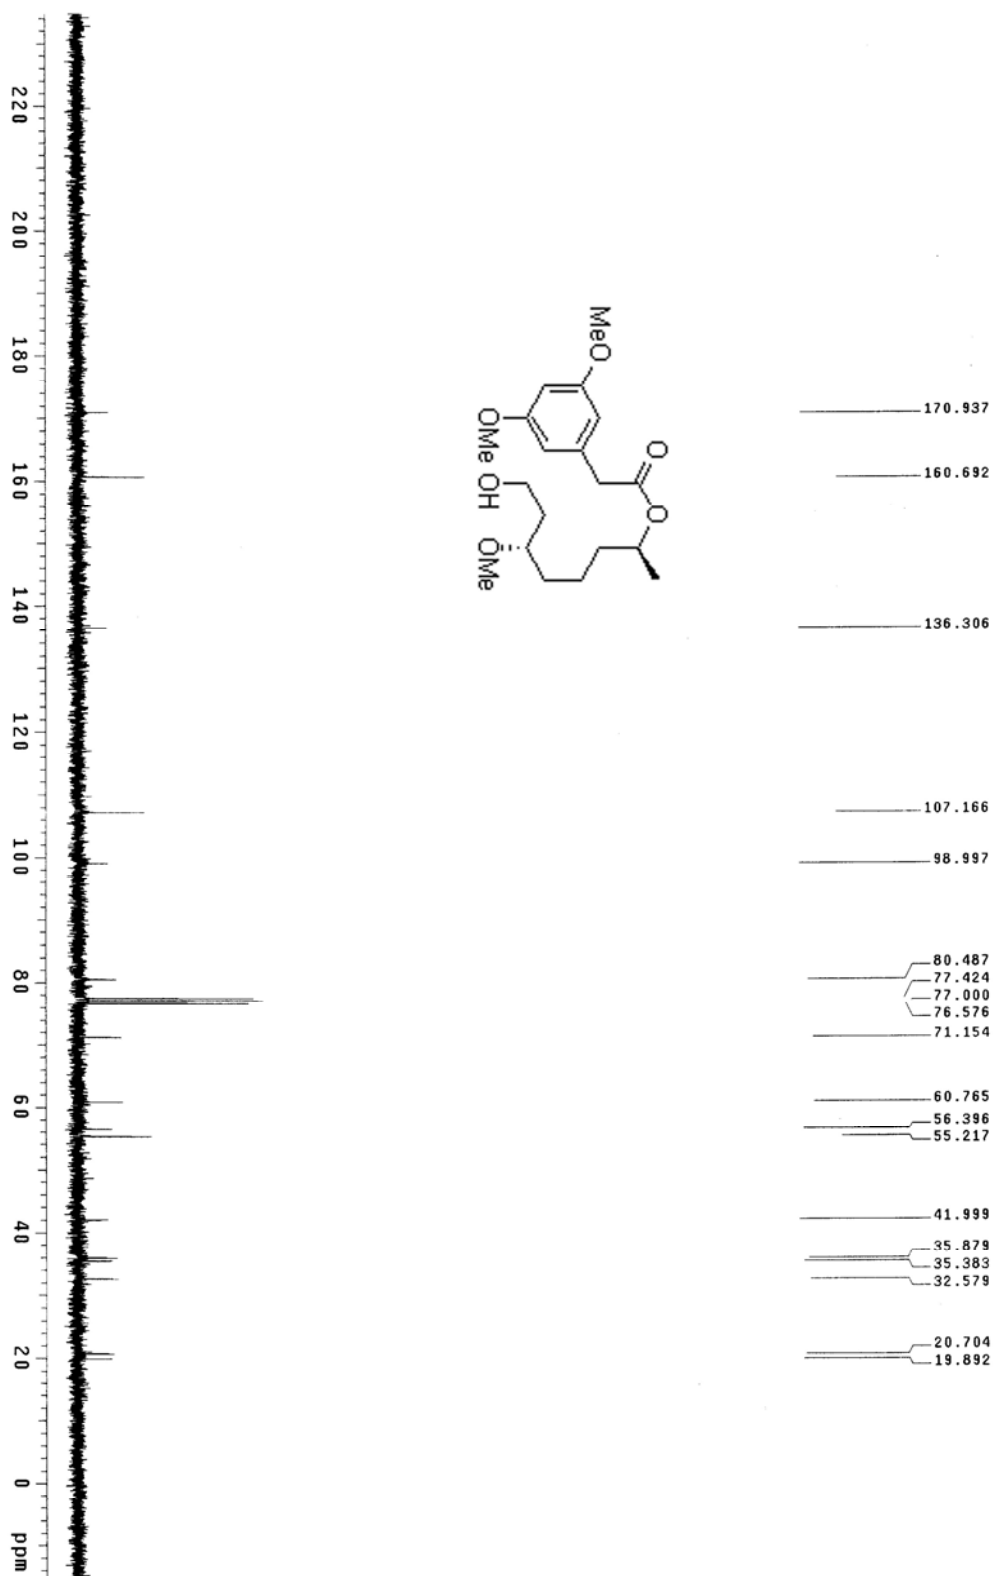

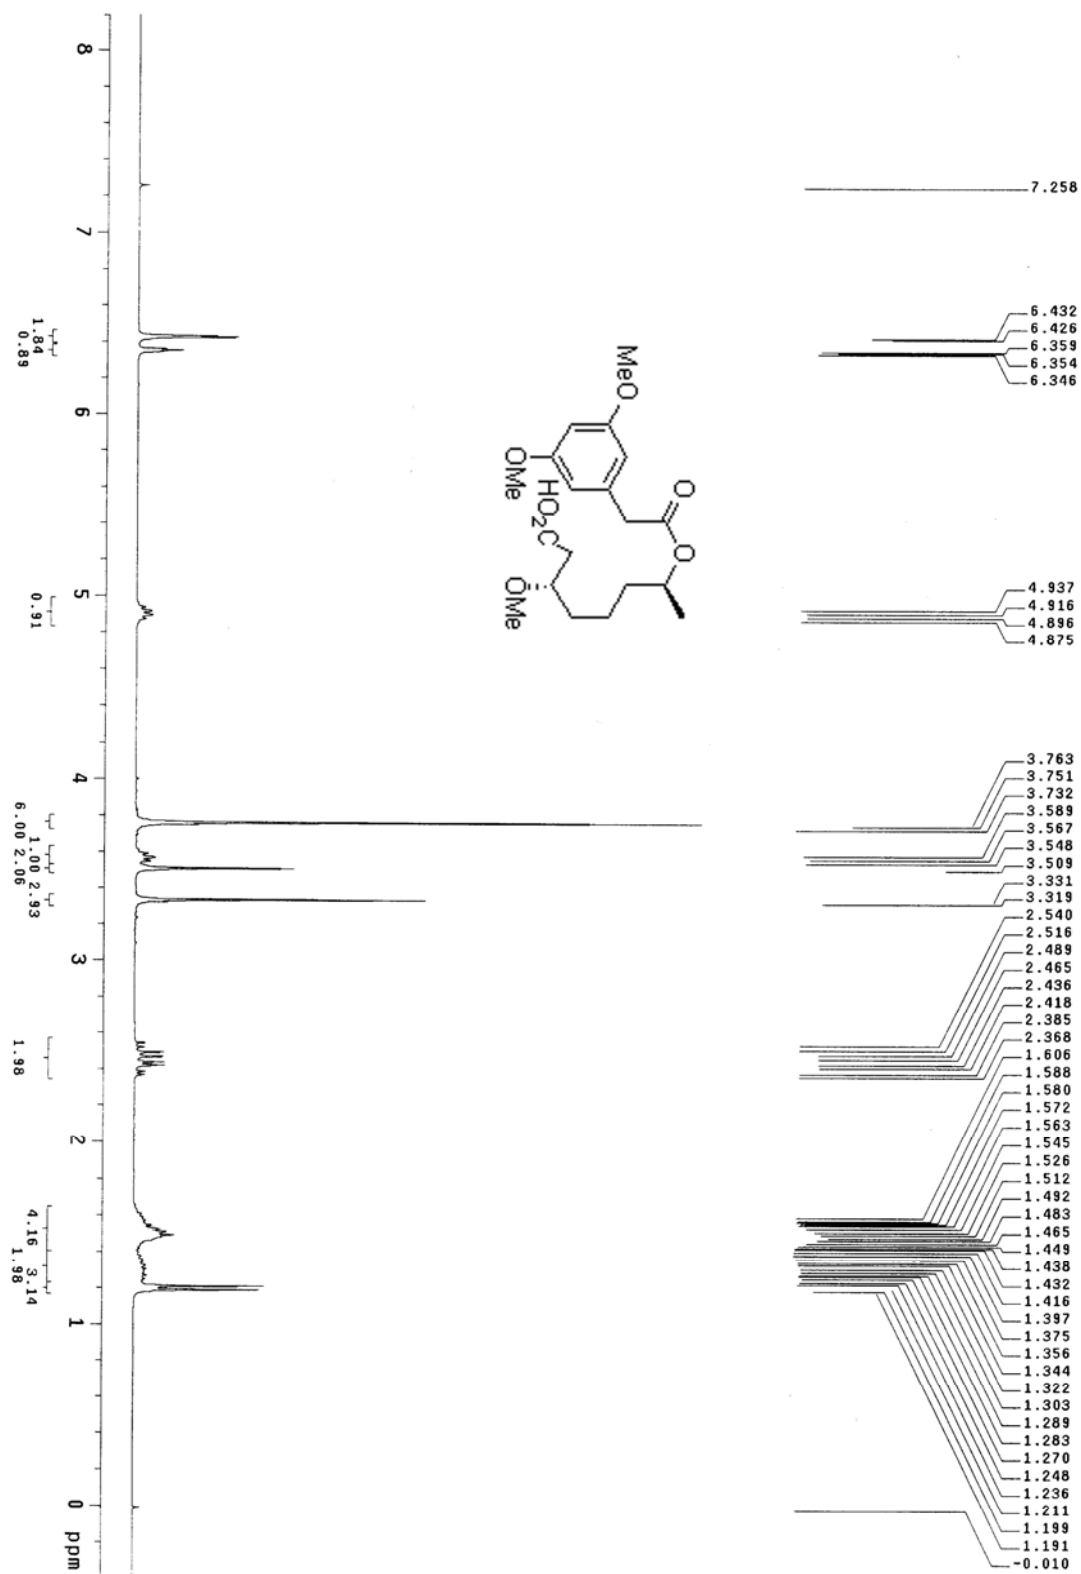

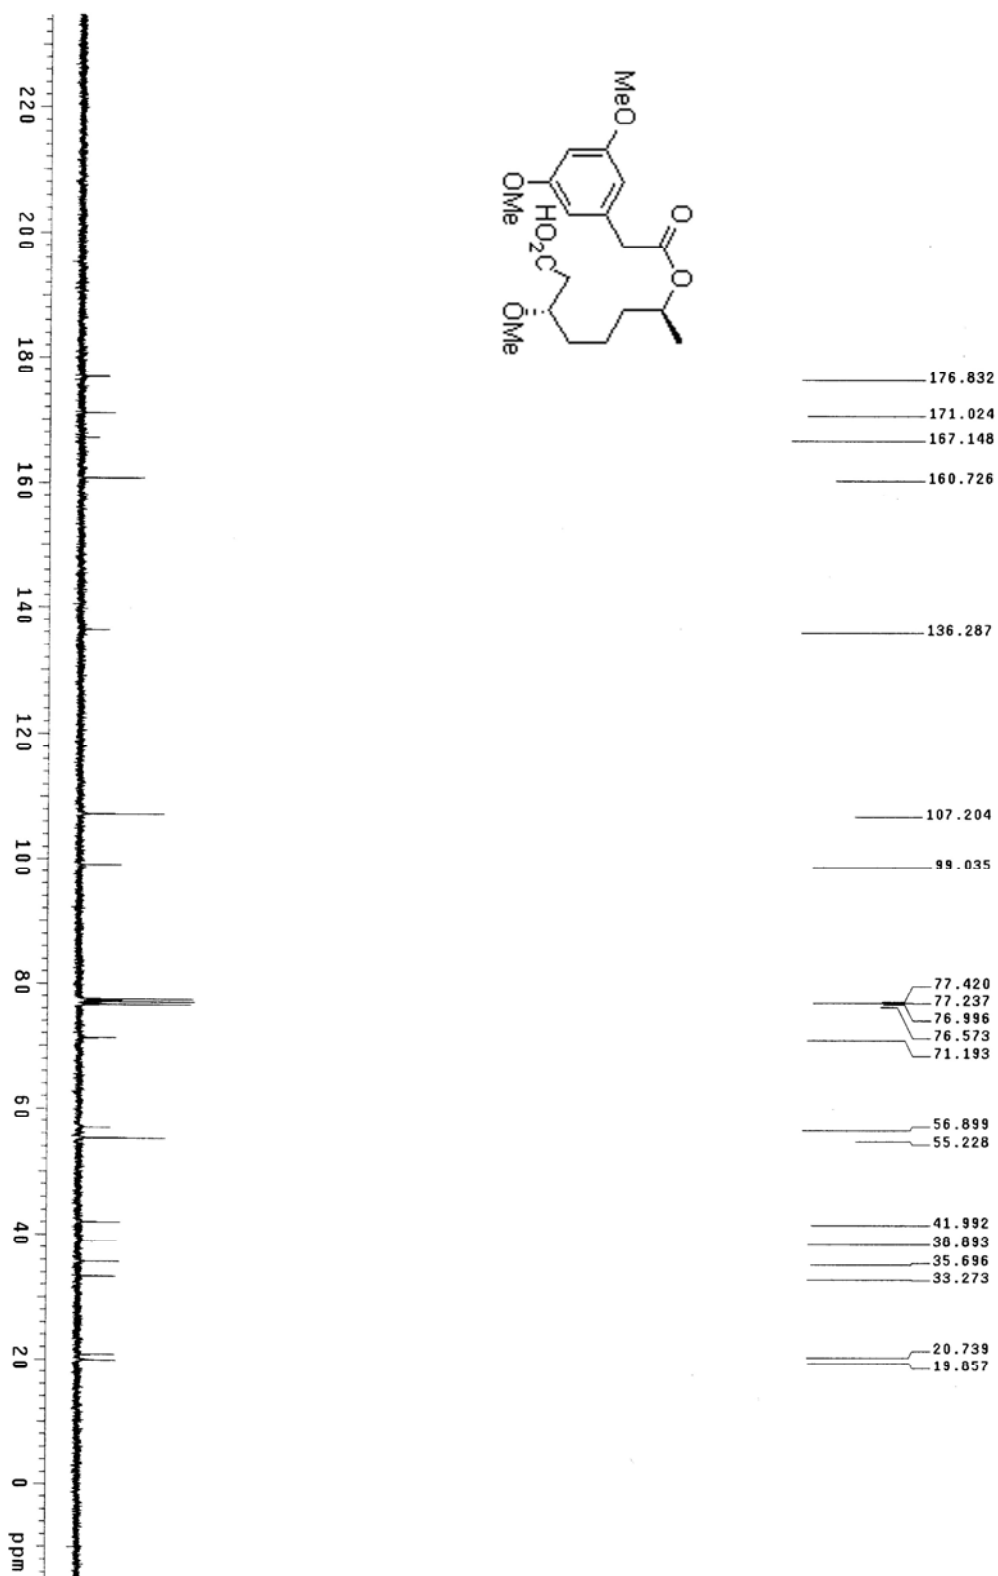

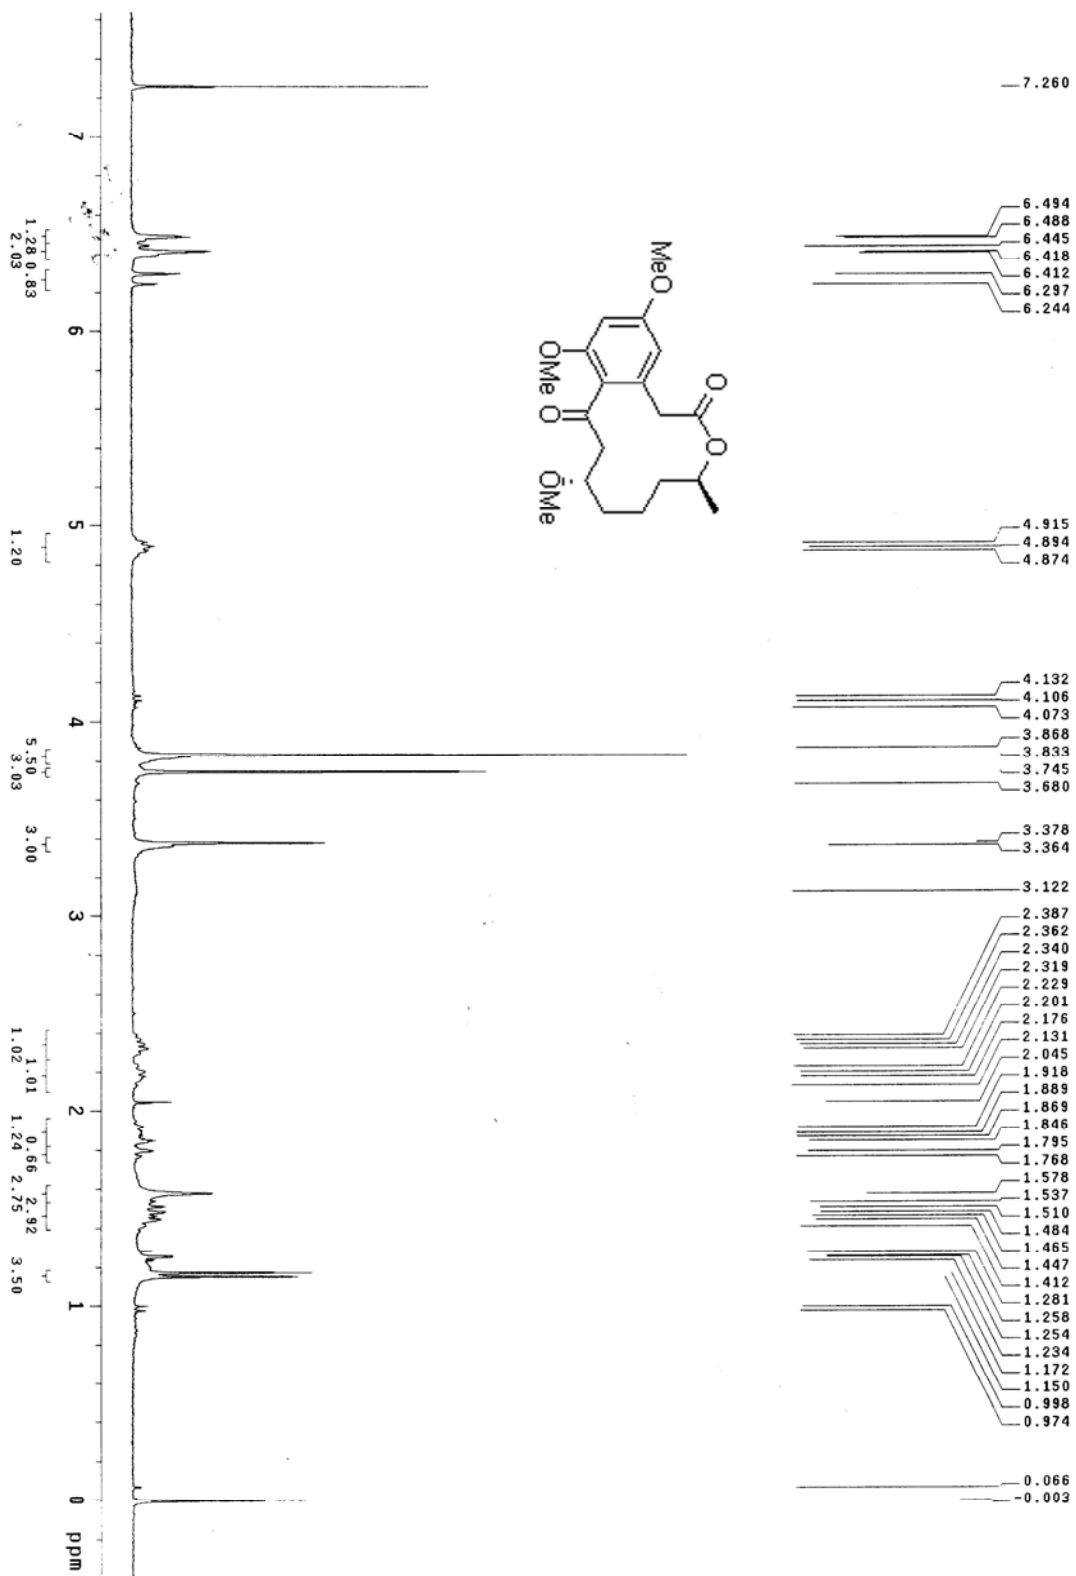

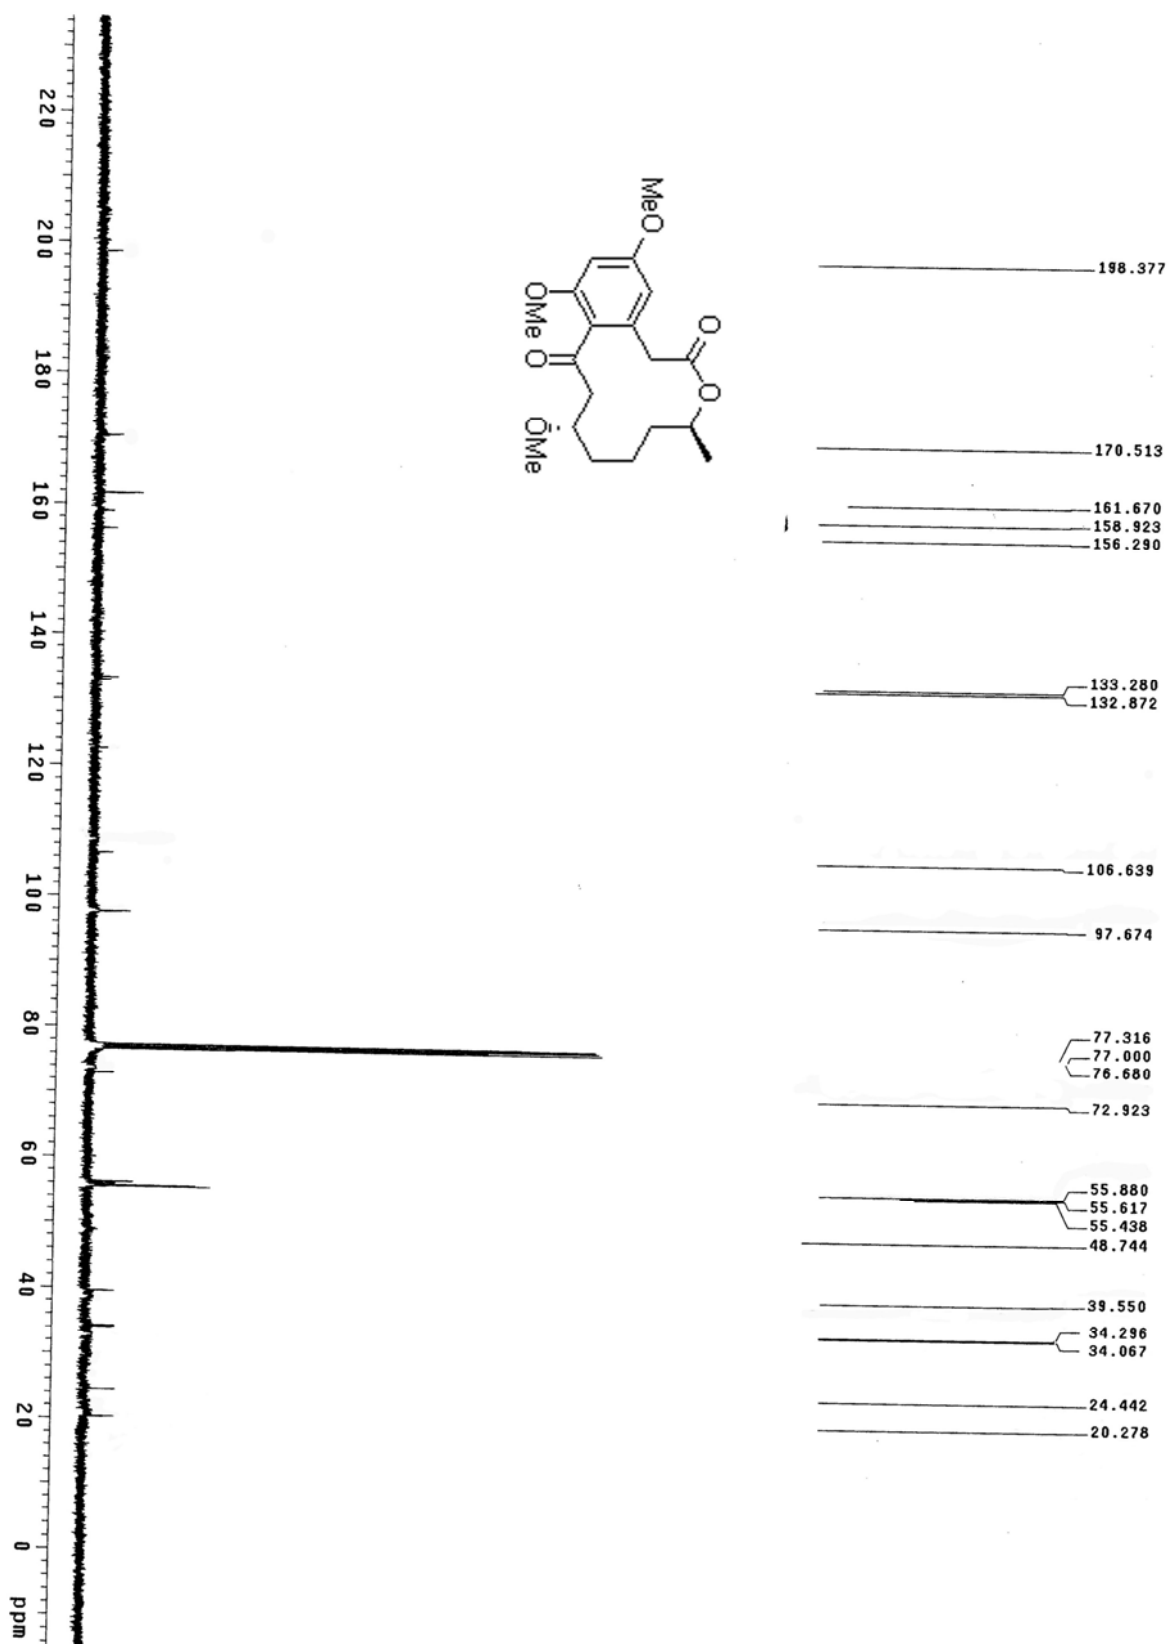

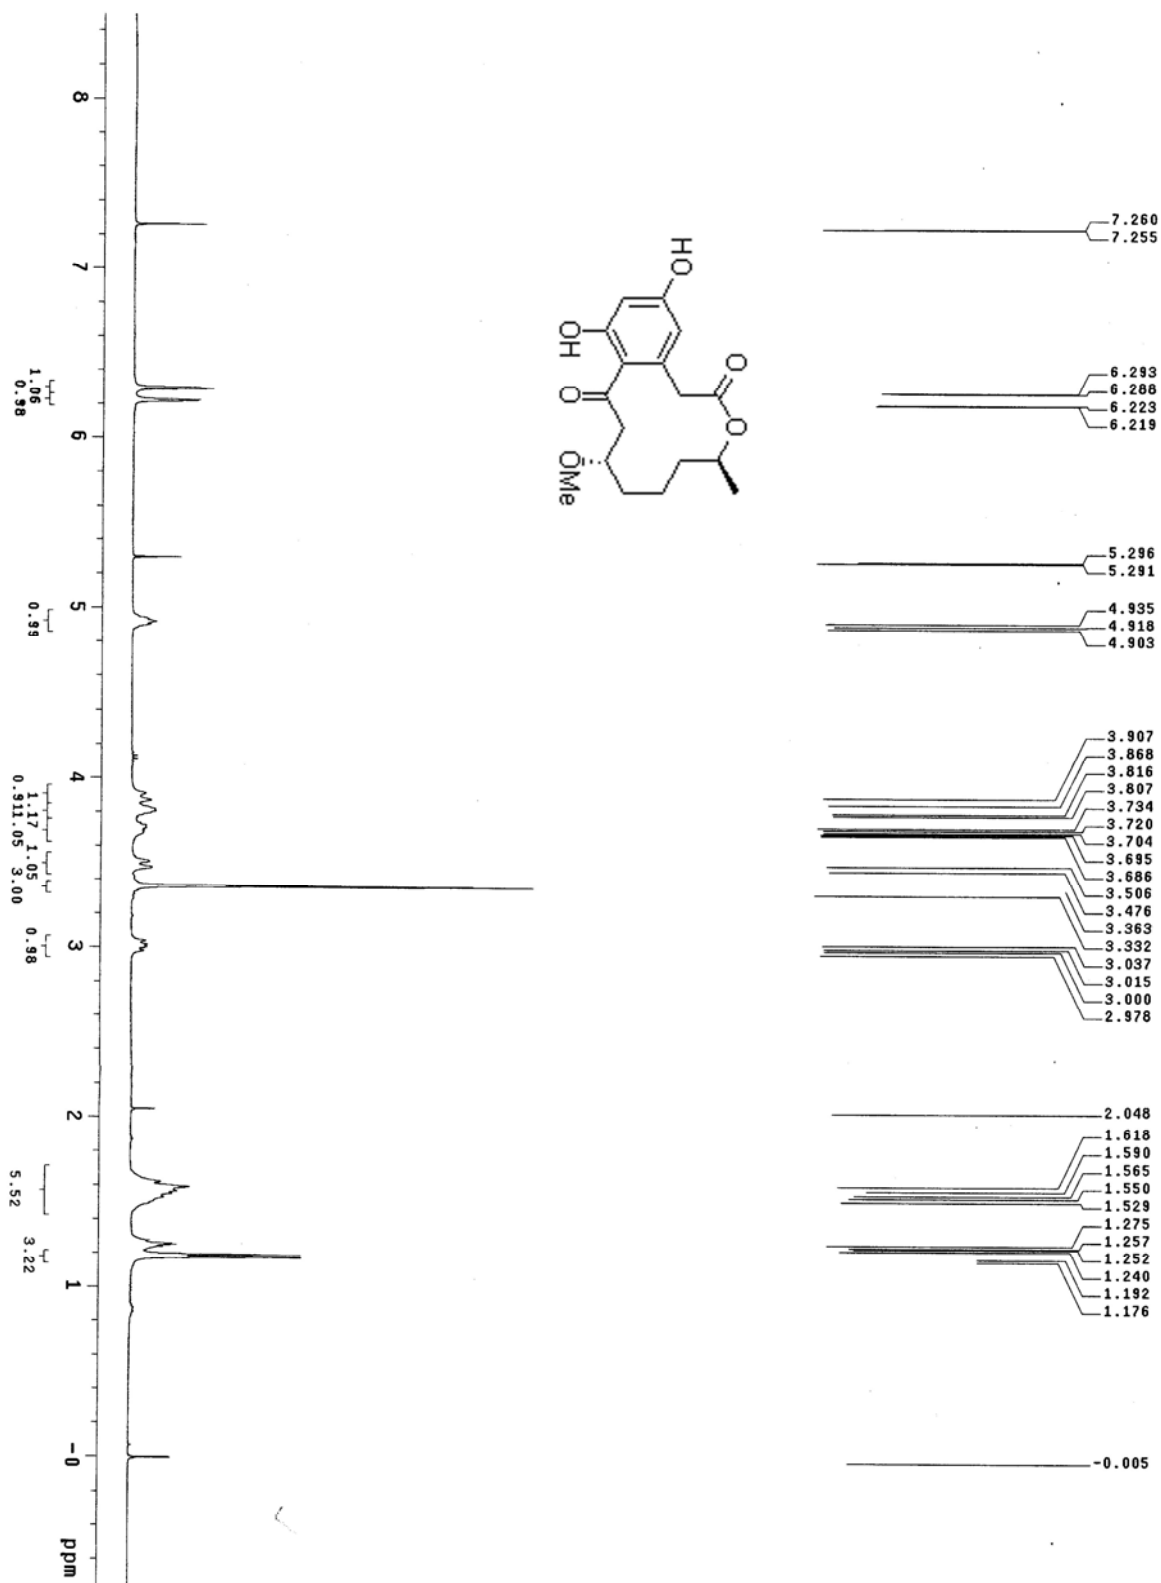



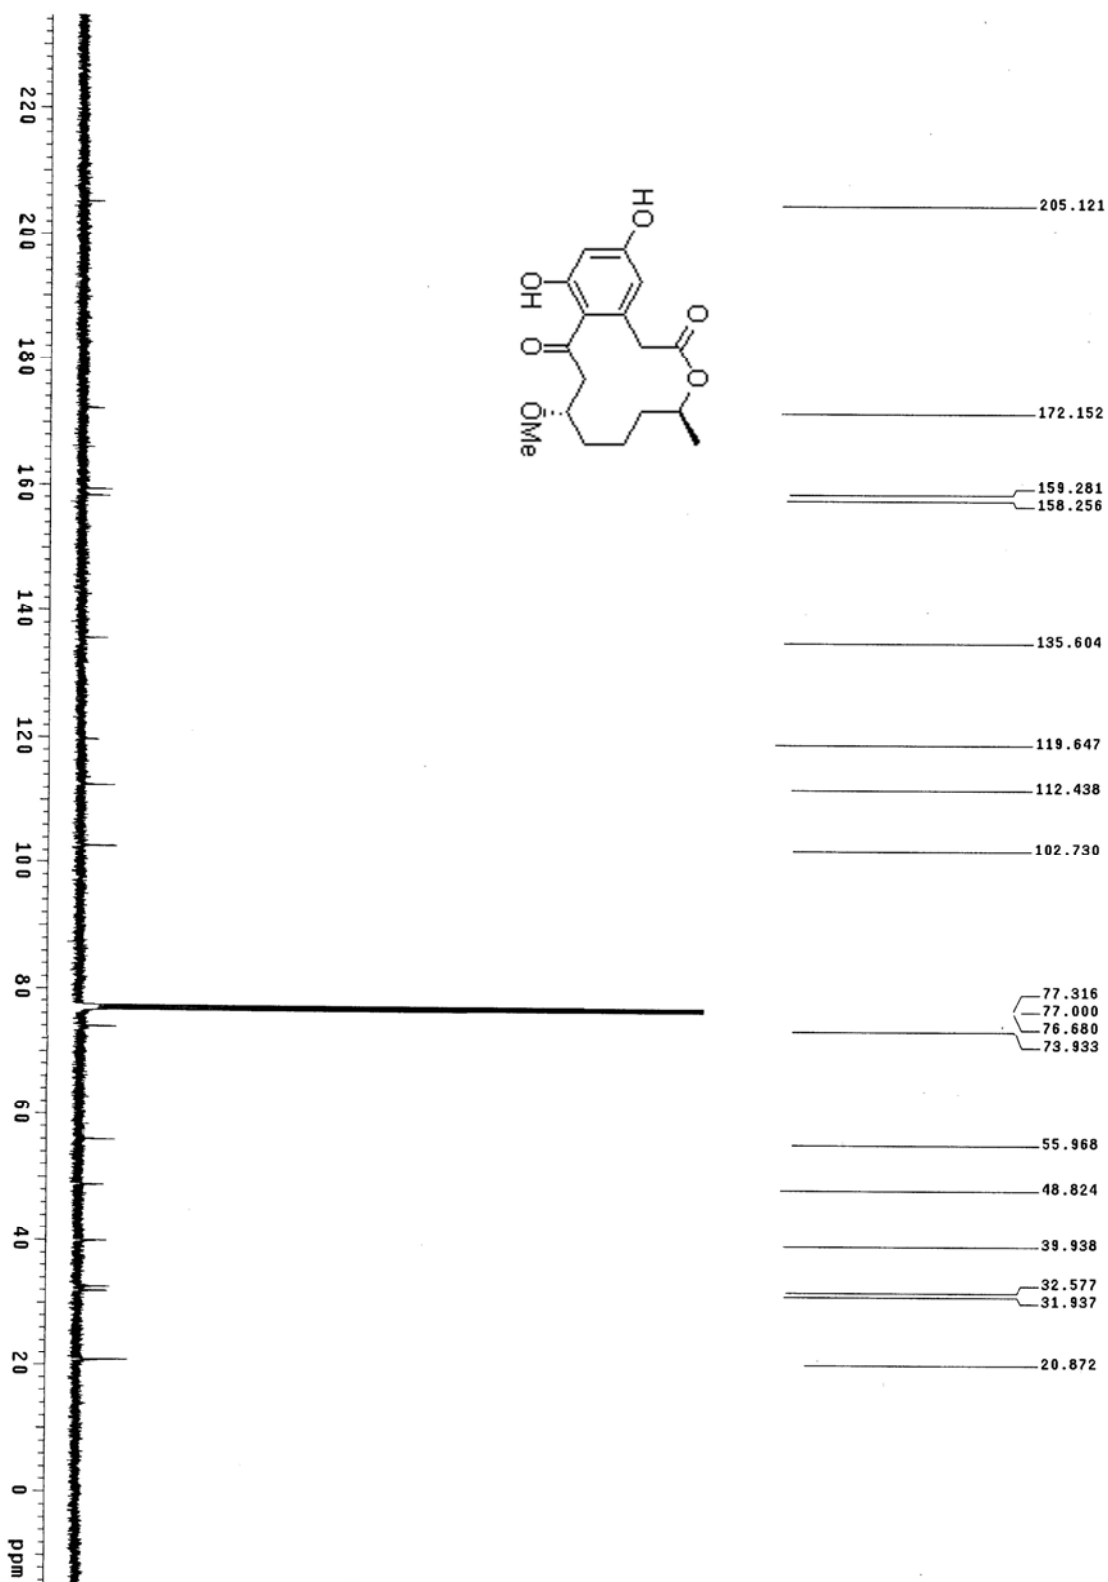

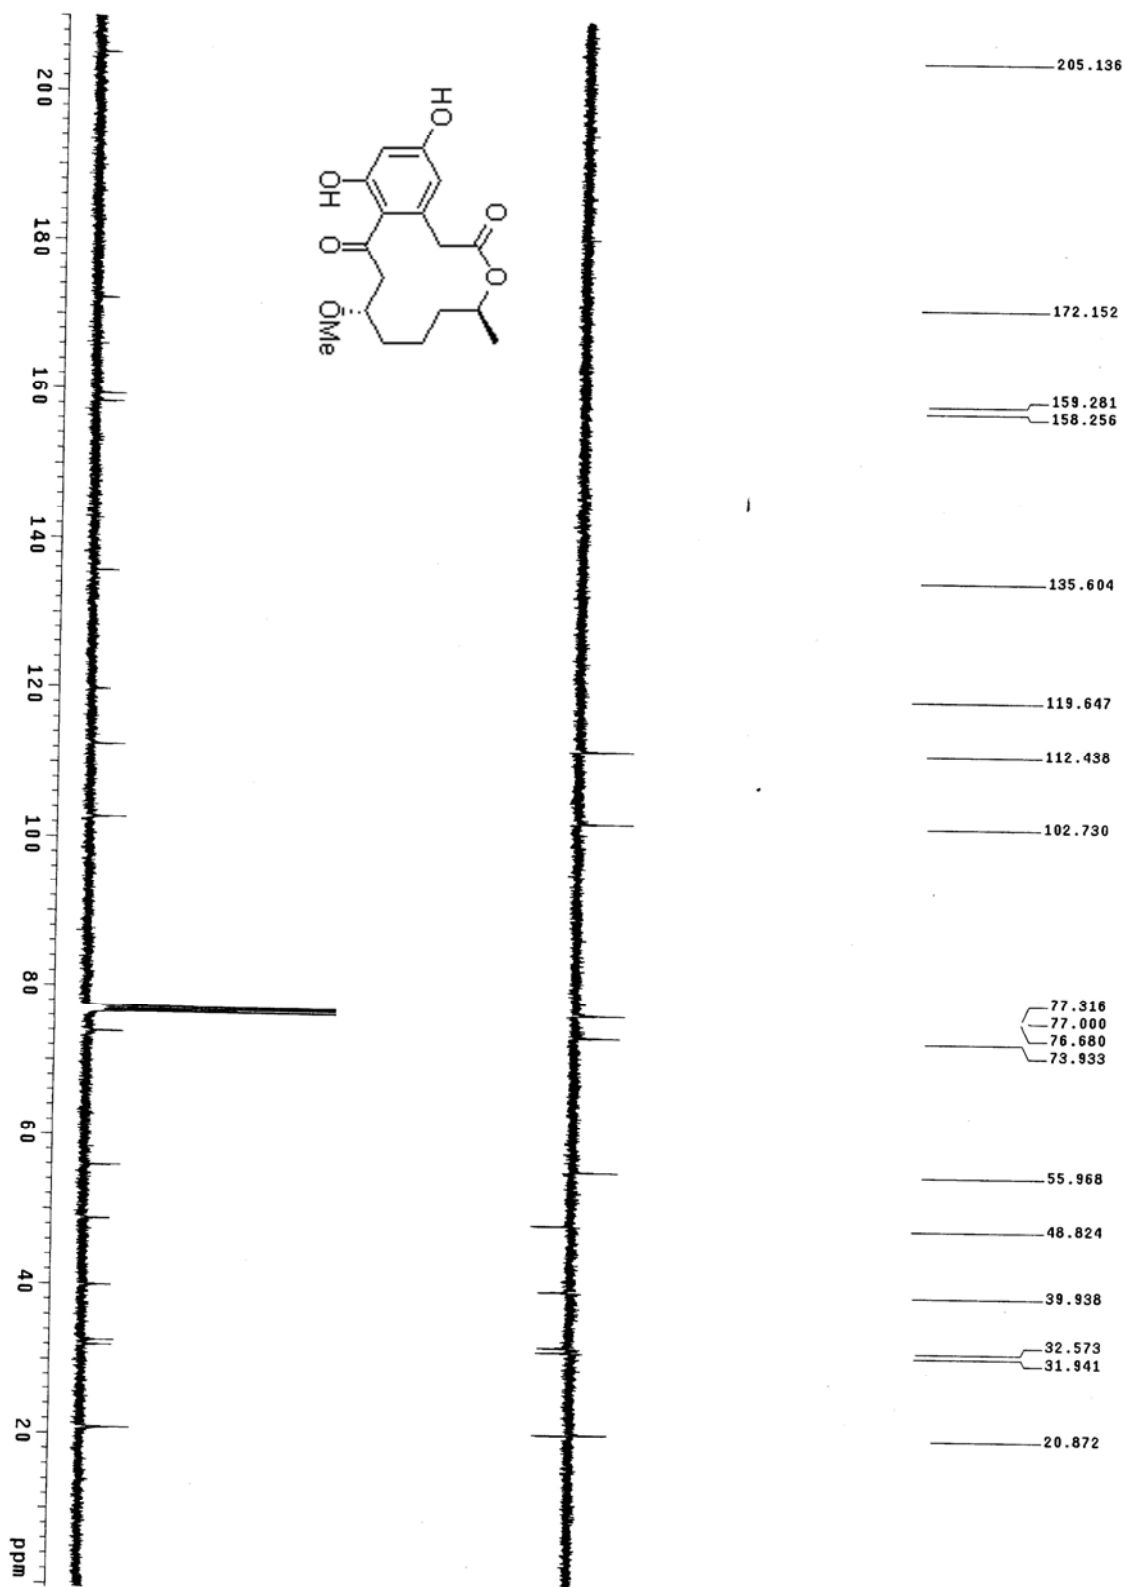

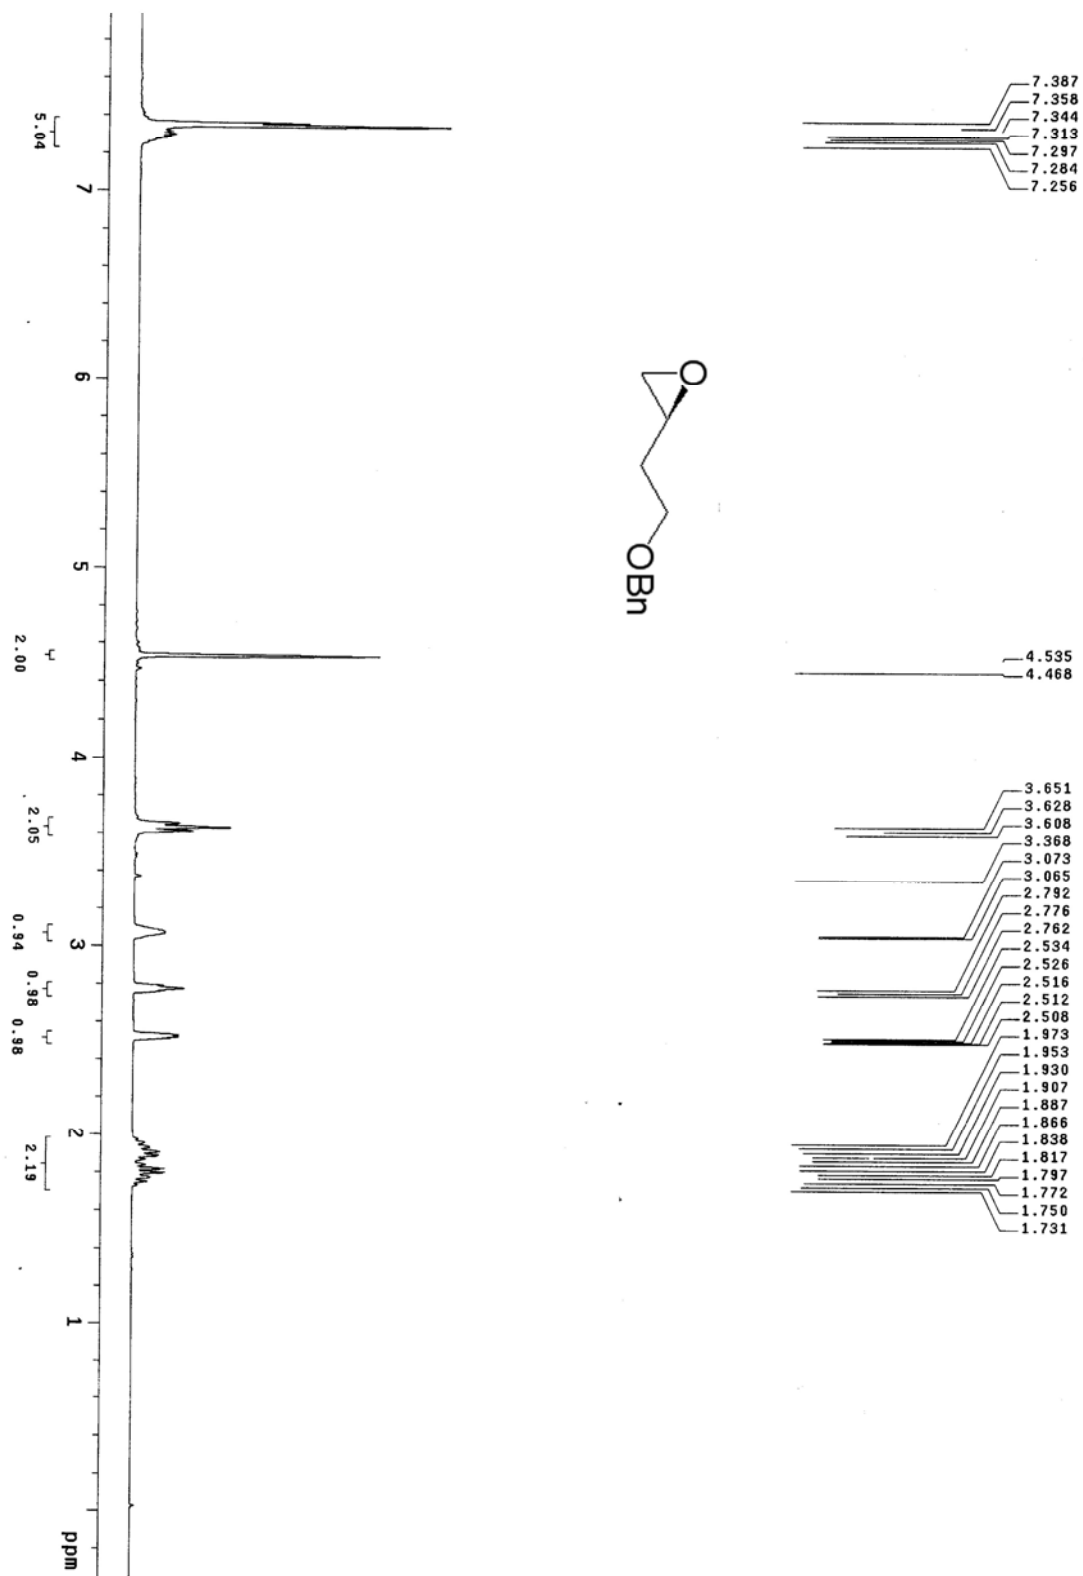

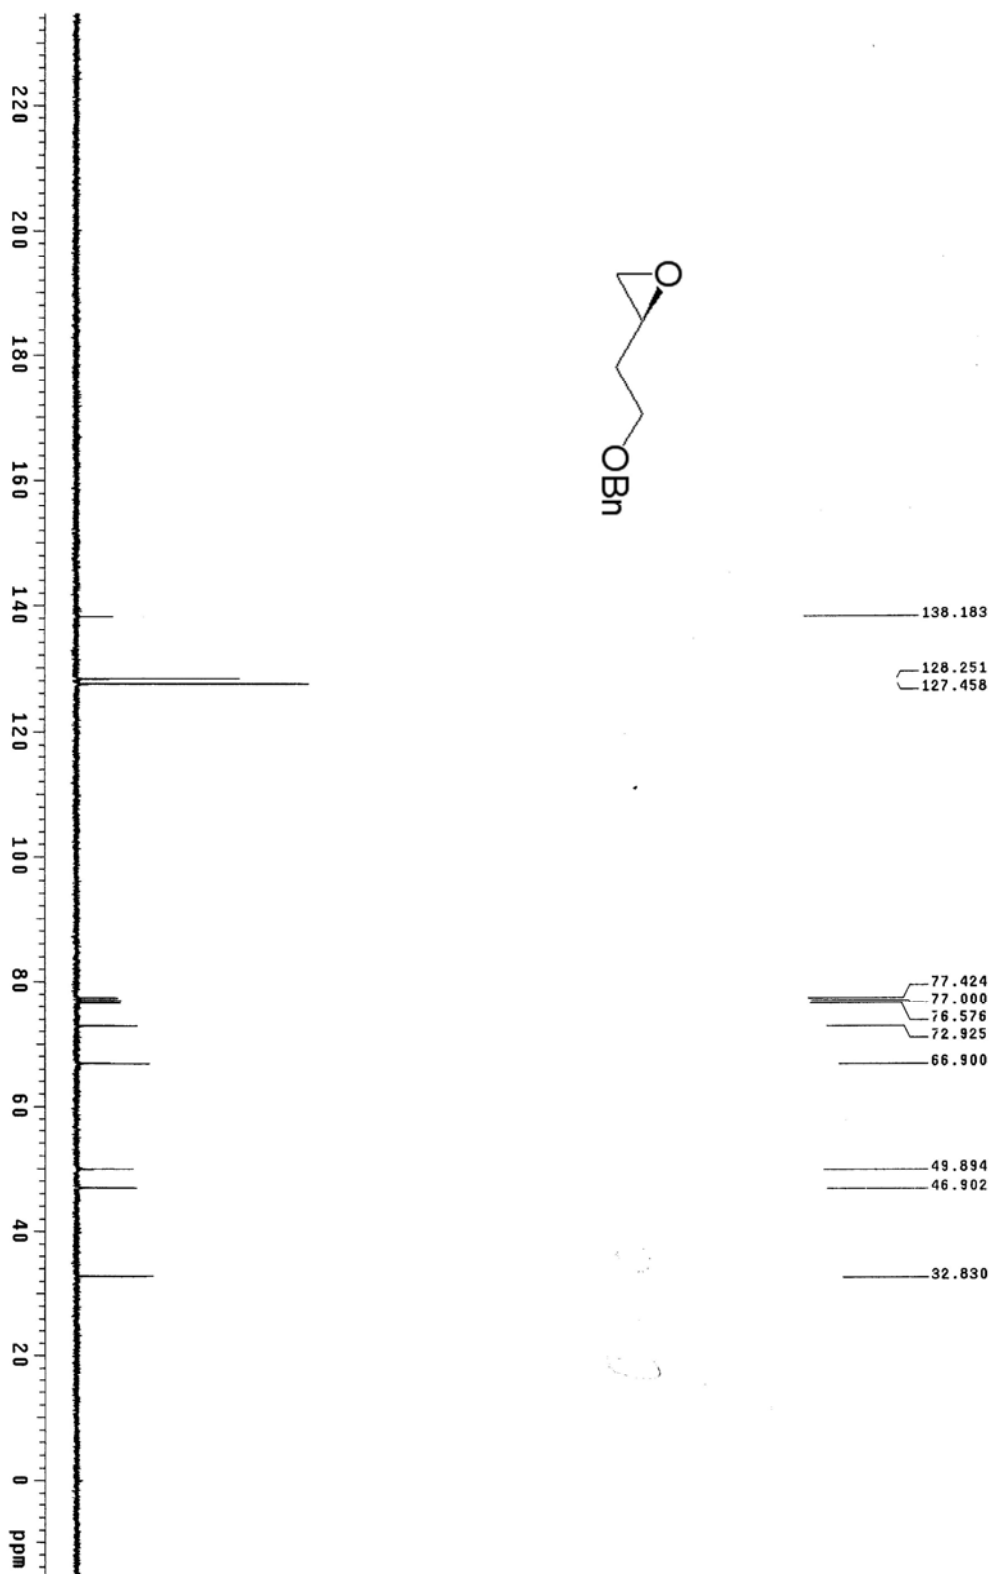

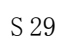

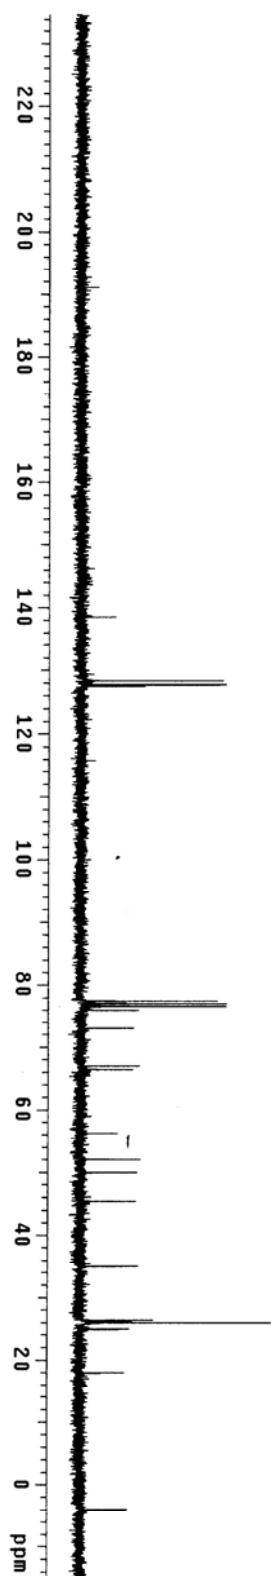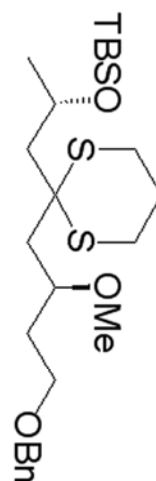

138.443  
128.278  
127.652  
127.458

77.424  
77.000  
76.576  
75.981  
72.994  
66.973  
66.404

56.220  
52.004  
49.924  
45.361

34.979  
26.344  
26.073  
25.955  
24.882  
17.938

-4.002  
-4.208

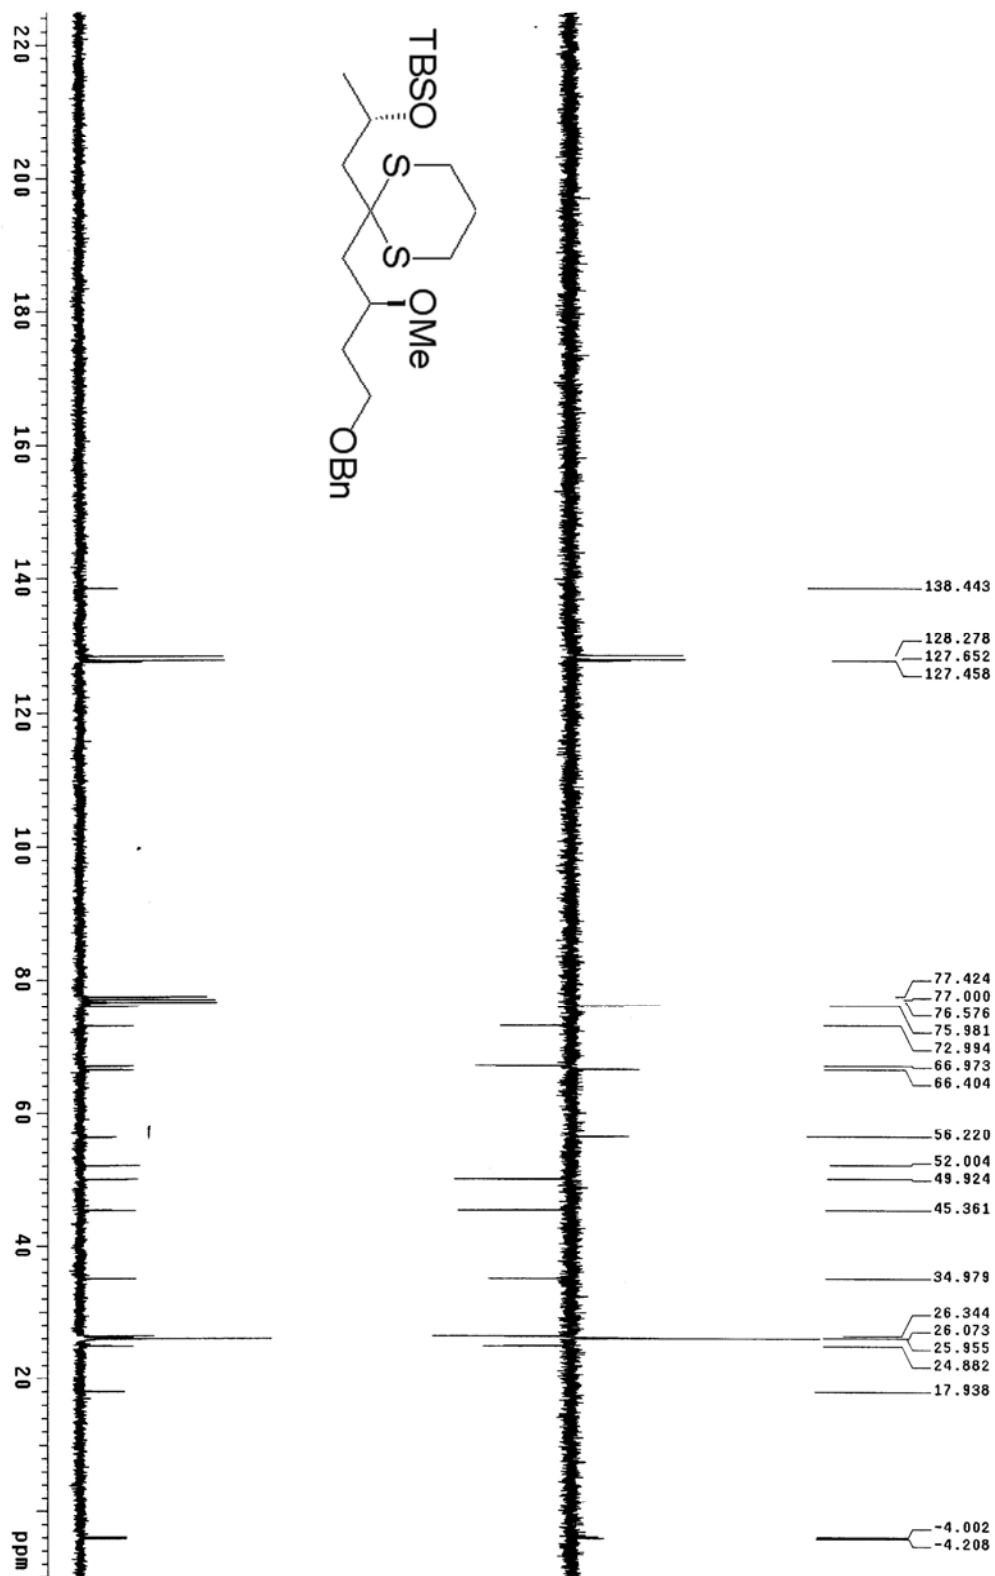

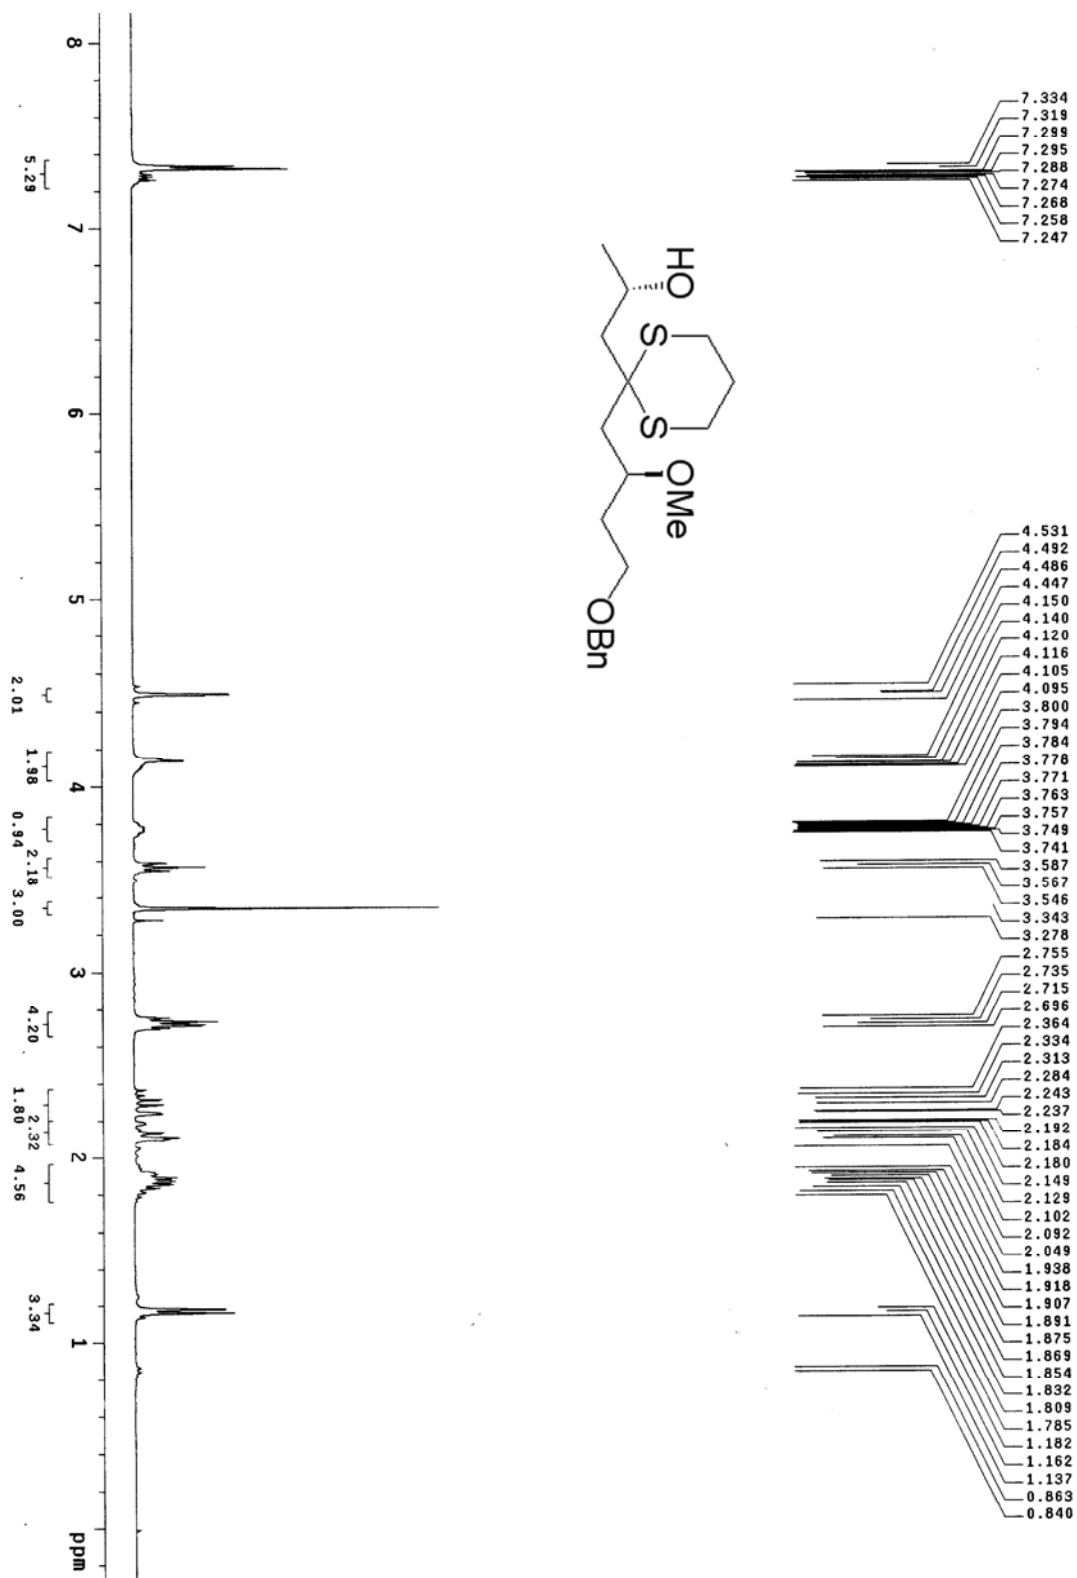



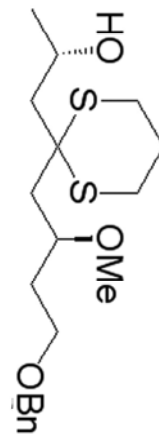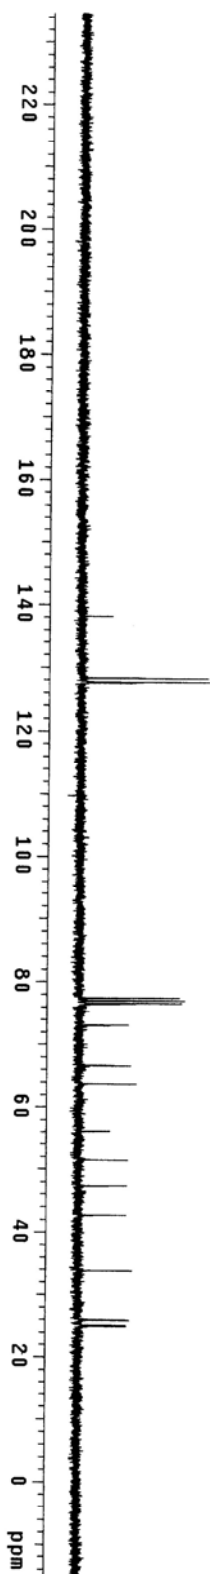

138.138  
128.267  
127.622  
127.515

77.424  
77.000  
76.576  
76.477  
73.085  
66.622  
63.703

56.136  
51.435  
47.311  
42.667

33.769  
25.981  
25.917  
25.096  
24.974

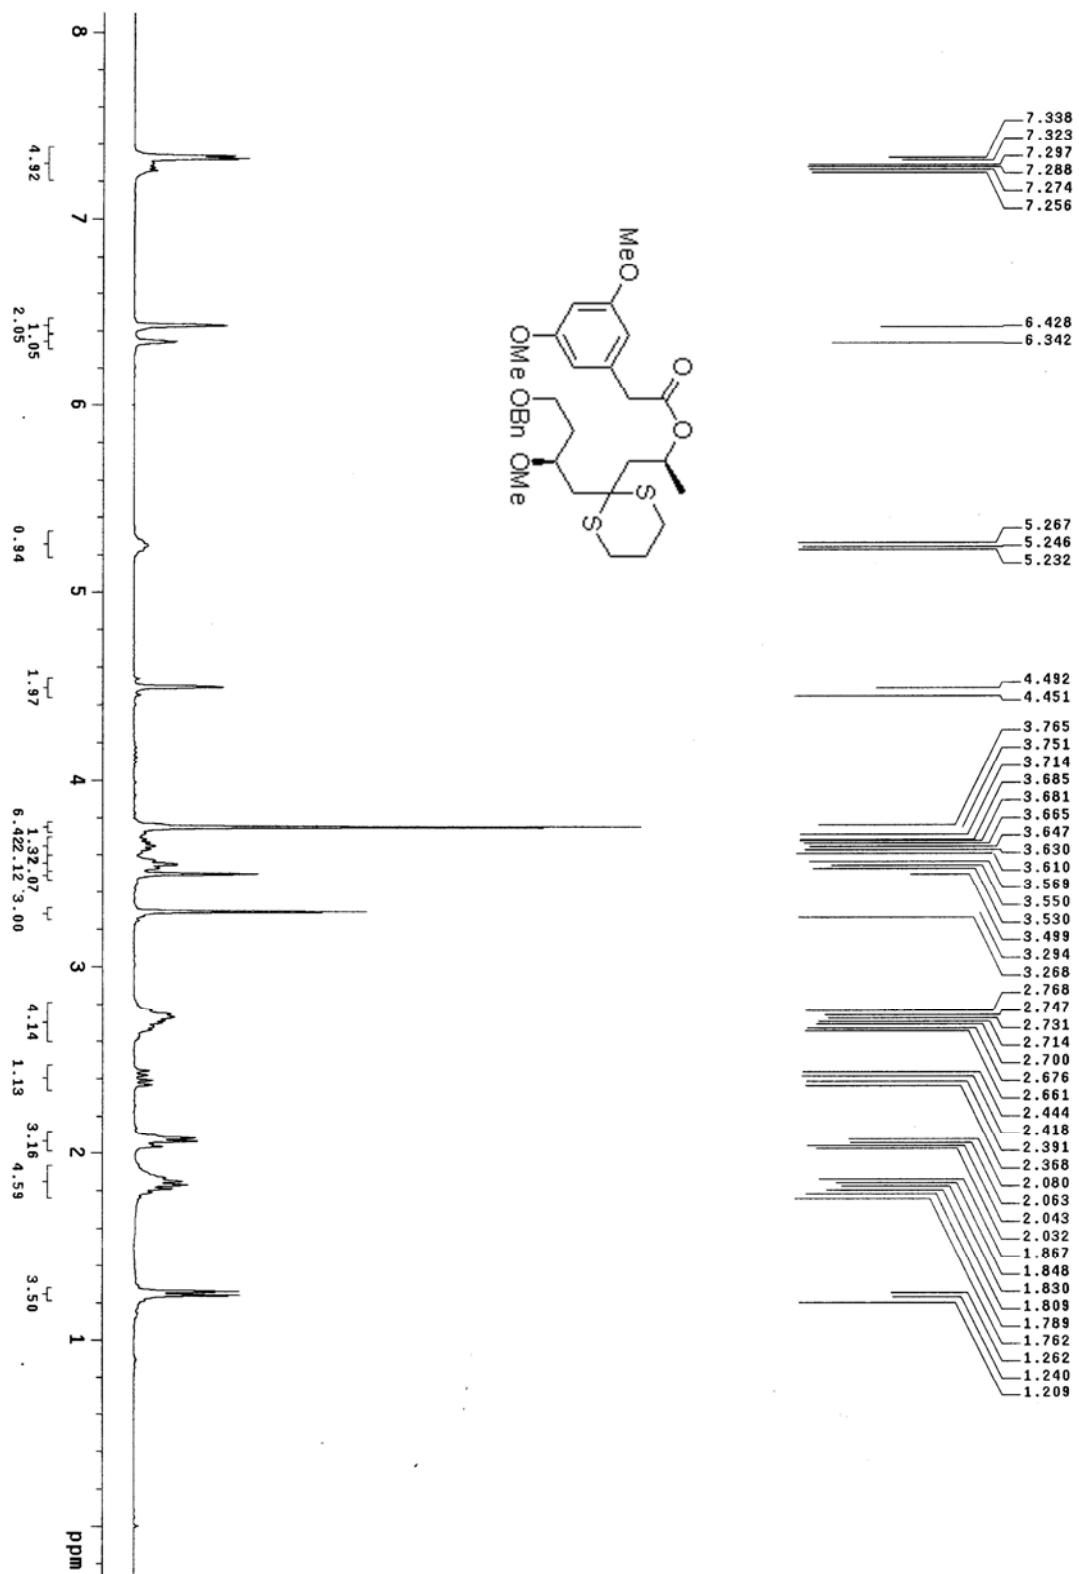

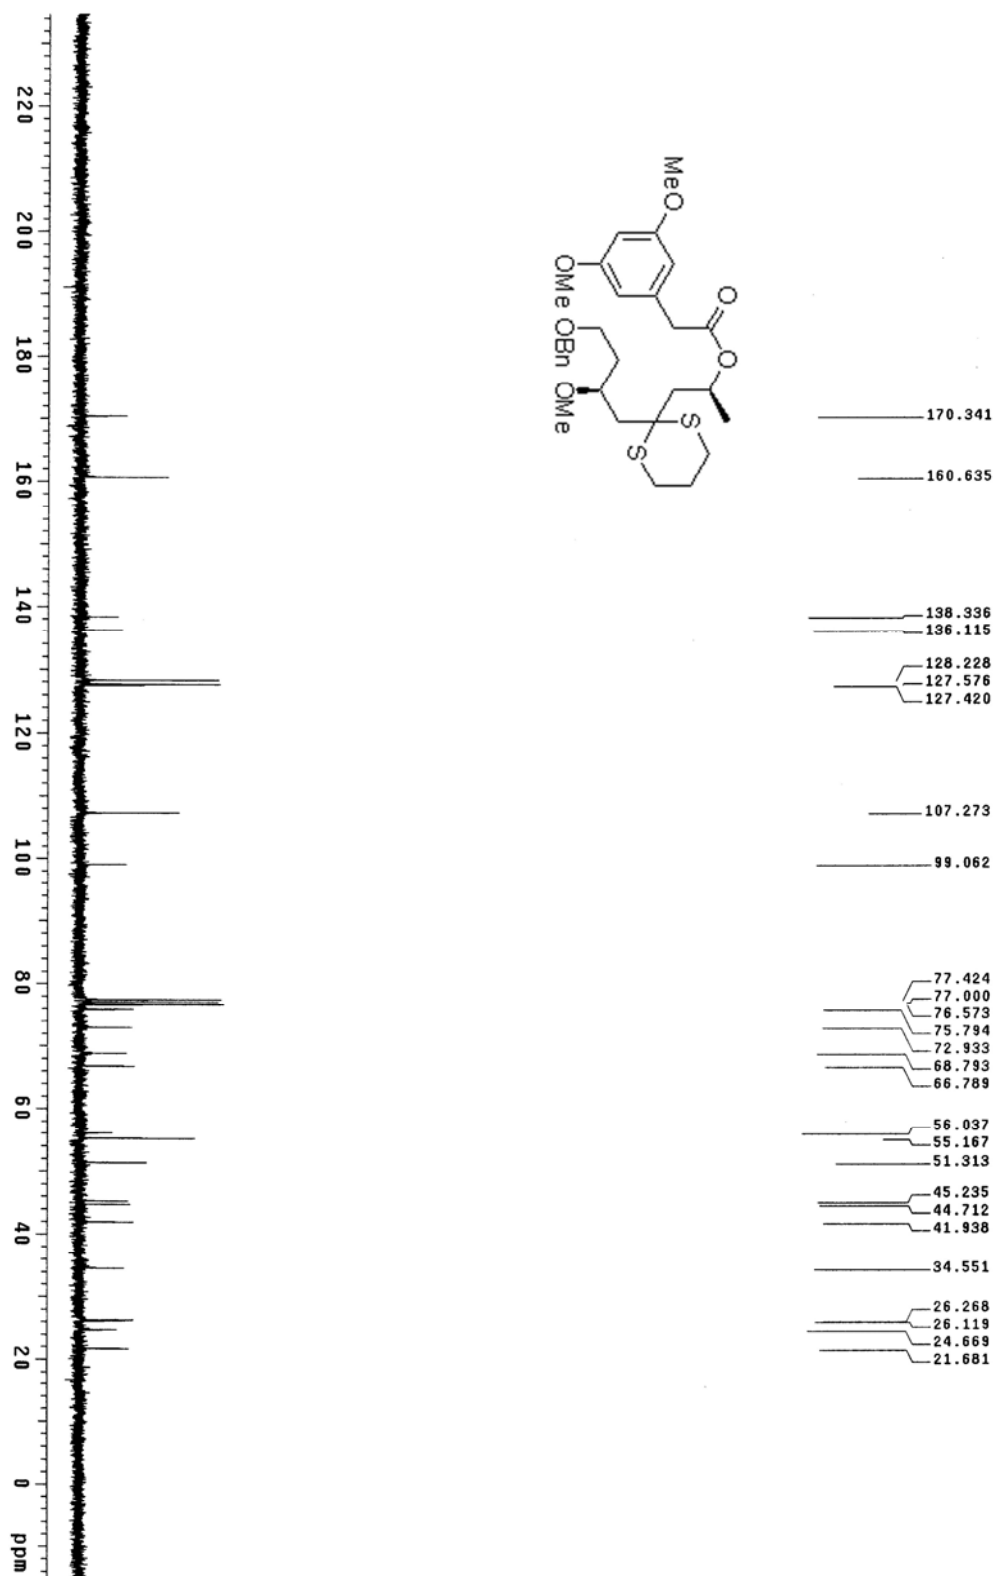

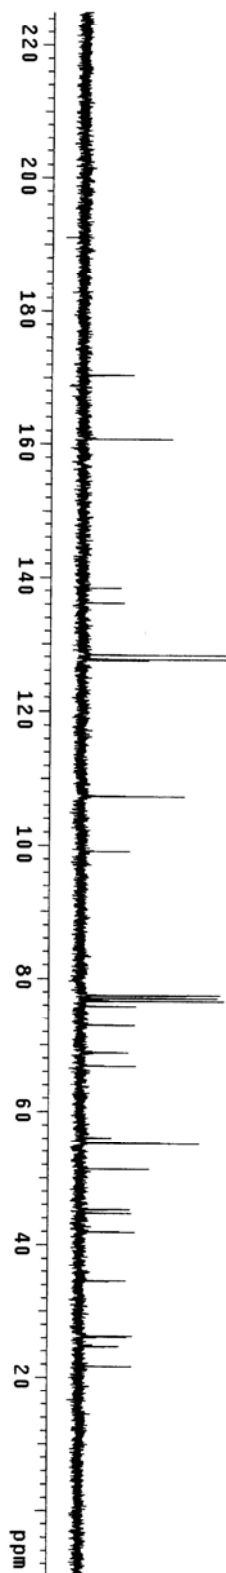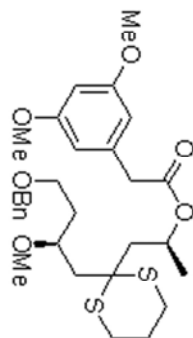

|         |
|---------|
| 170.341 |
| 160.635 |
| 138.336 |
| 136.115 |
| 128.228 |
| 127.576 |
| 127.420 |
| 107.273 |
| 99.062  |
| 77.424  |
| 77.000  |
| 76.573  |
| 75.794  |
| 72.933  |
| 68.793  |
| 66.789  |
| 56.037  |
| 55.167  |
| 51.309  |
| 45.235  |
| 44.712  |
| 41.938  |
| 34.551  |
| 26.264  |
| 26.119  |
| 24.673  |
| 21.681  |

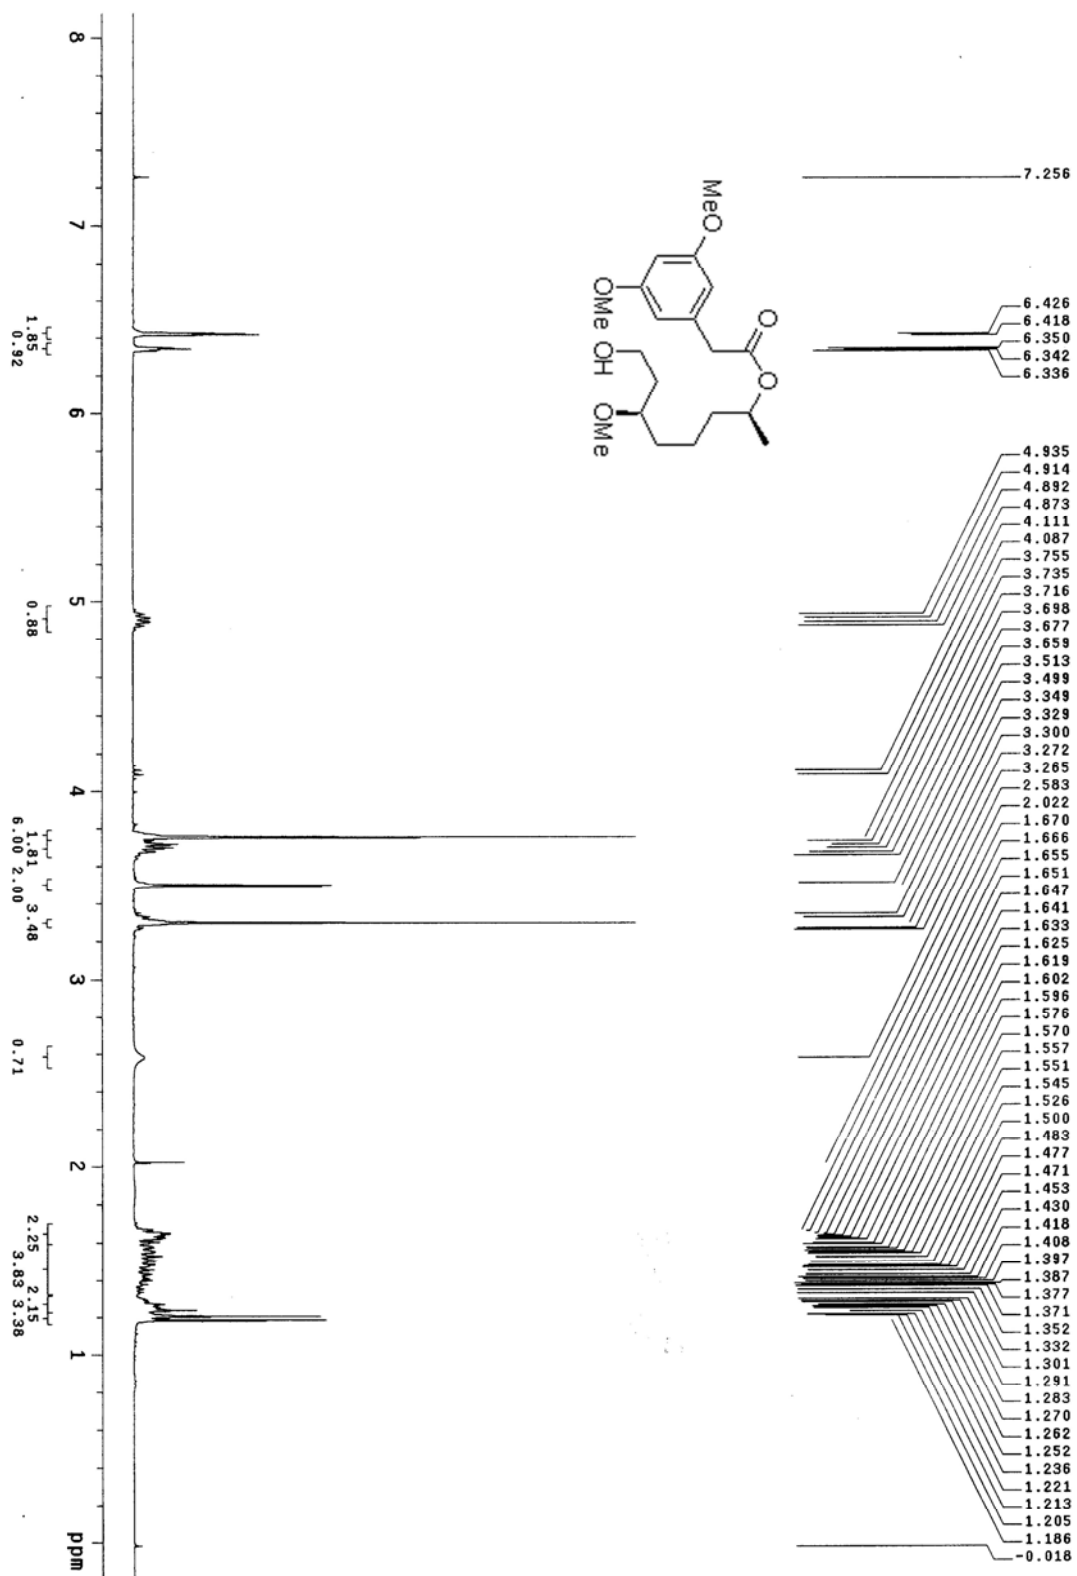

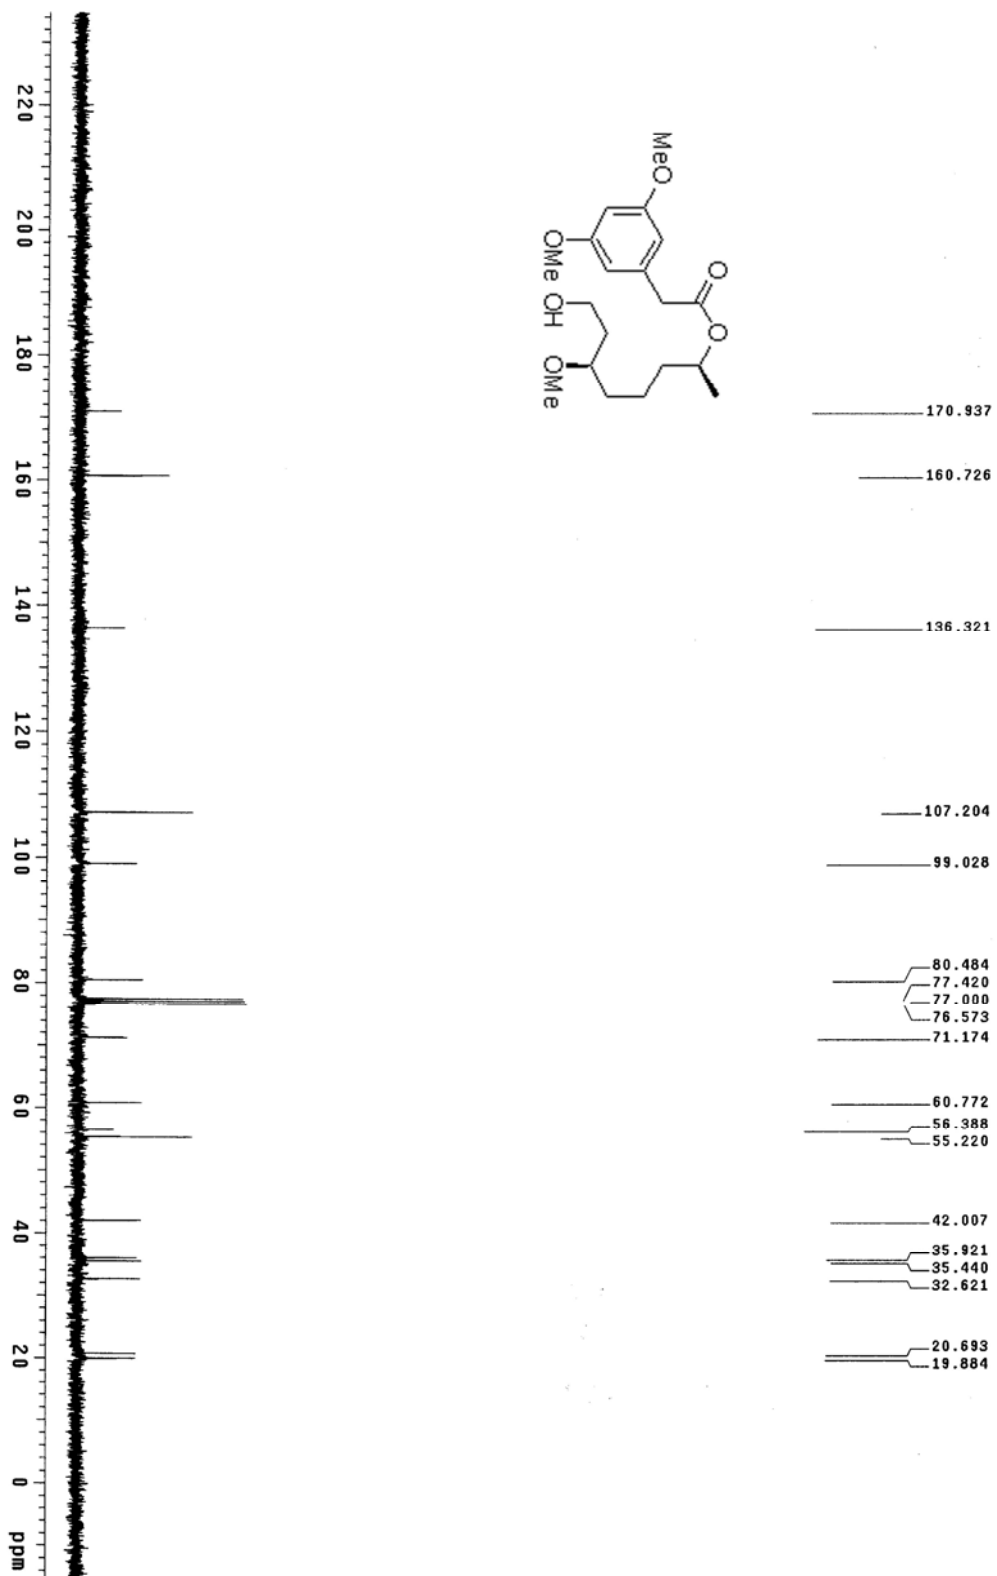

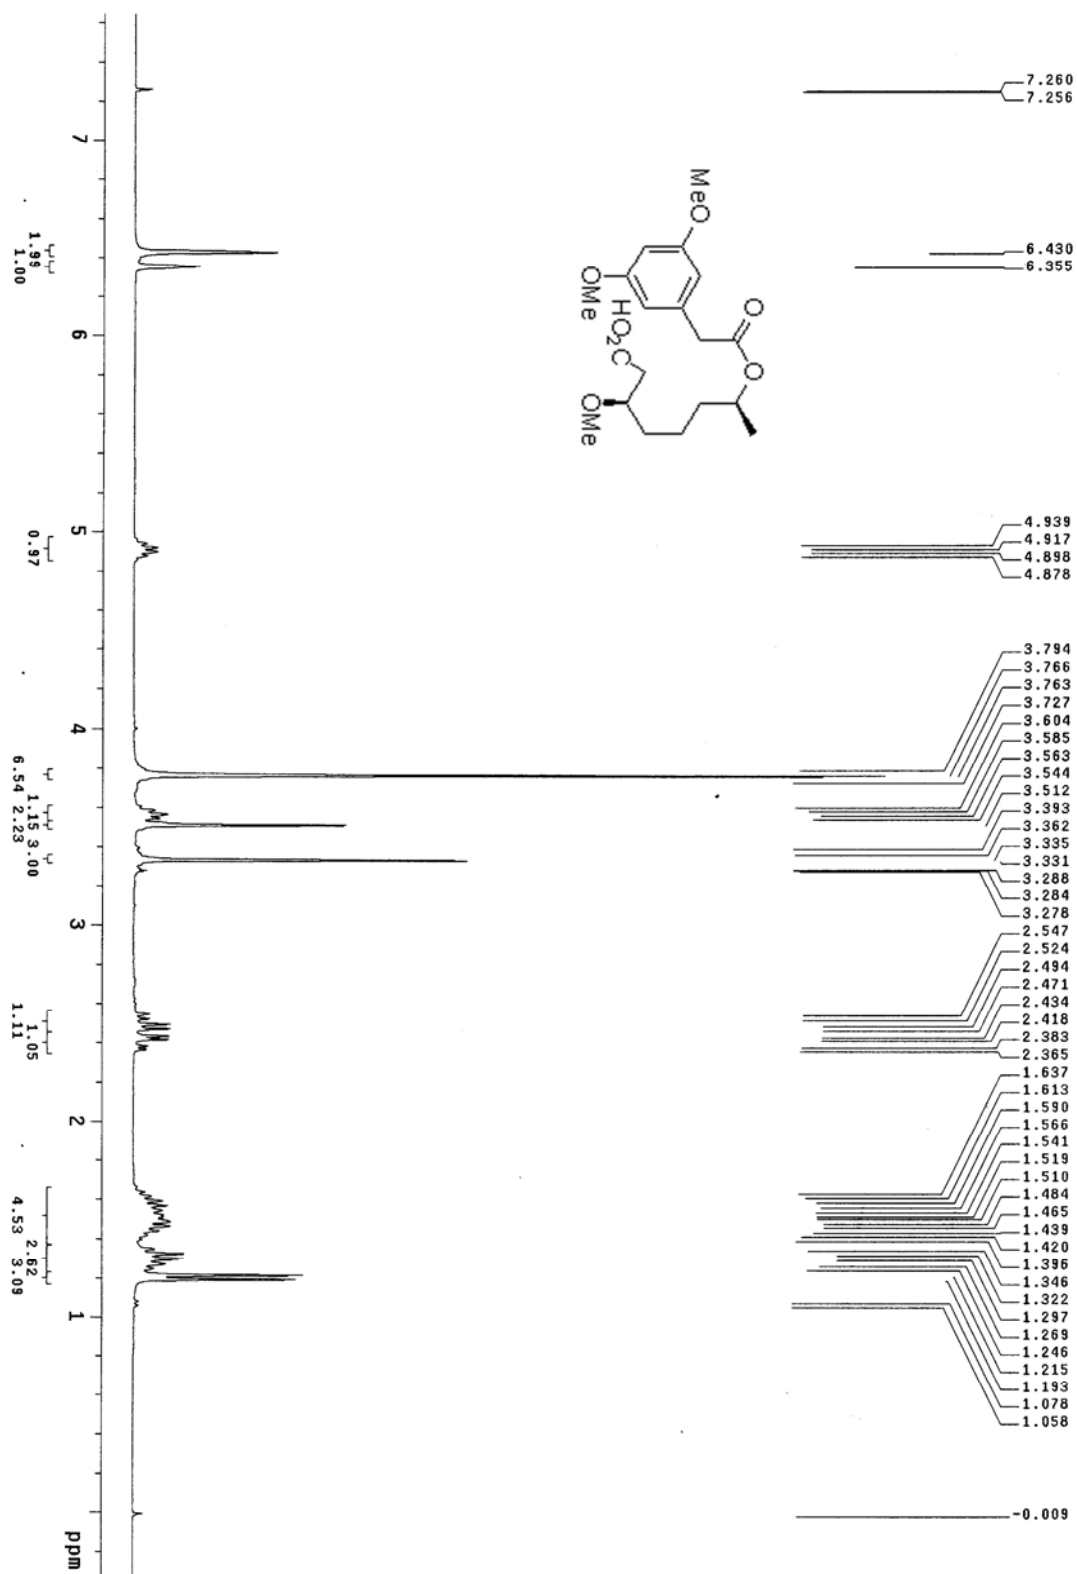

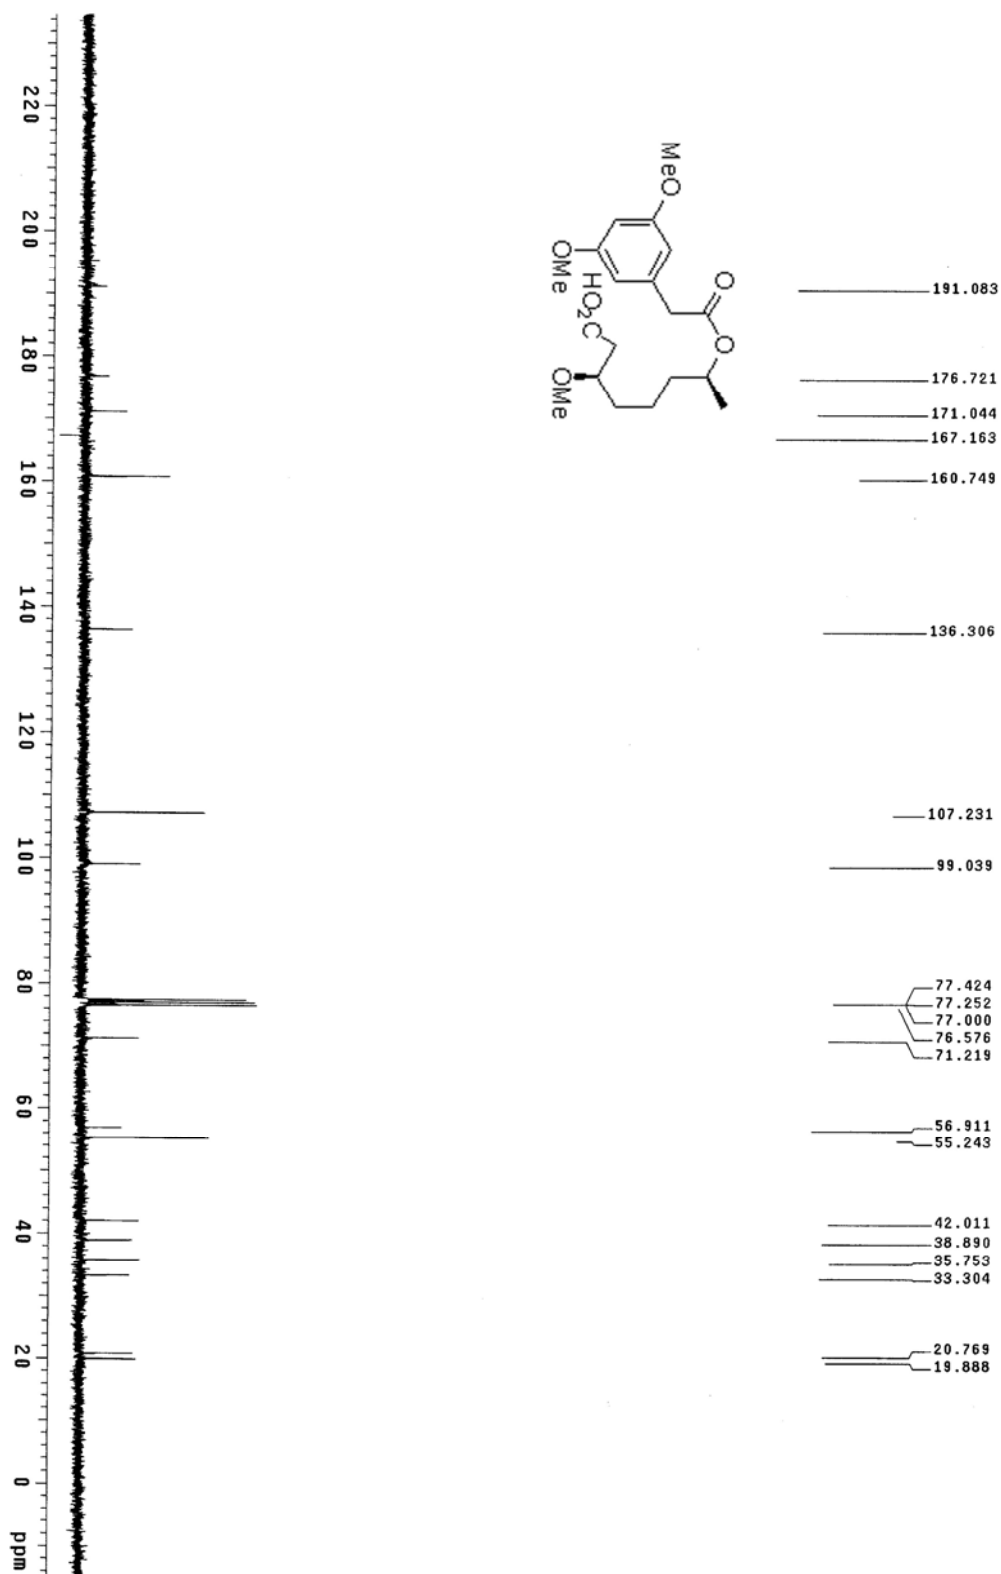



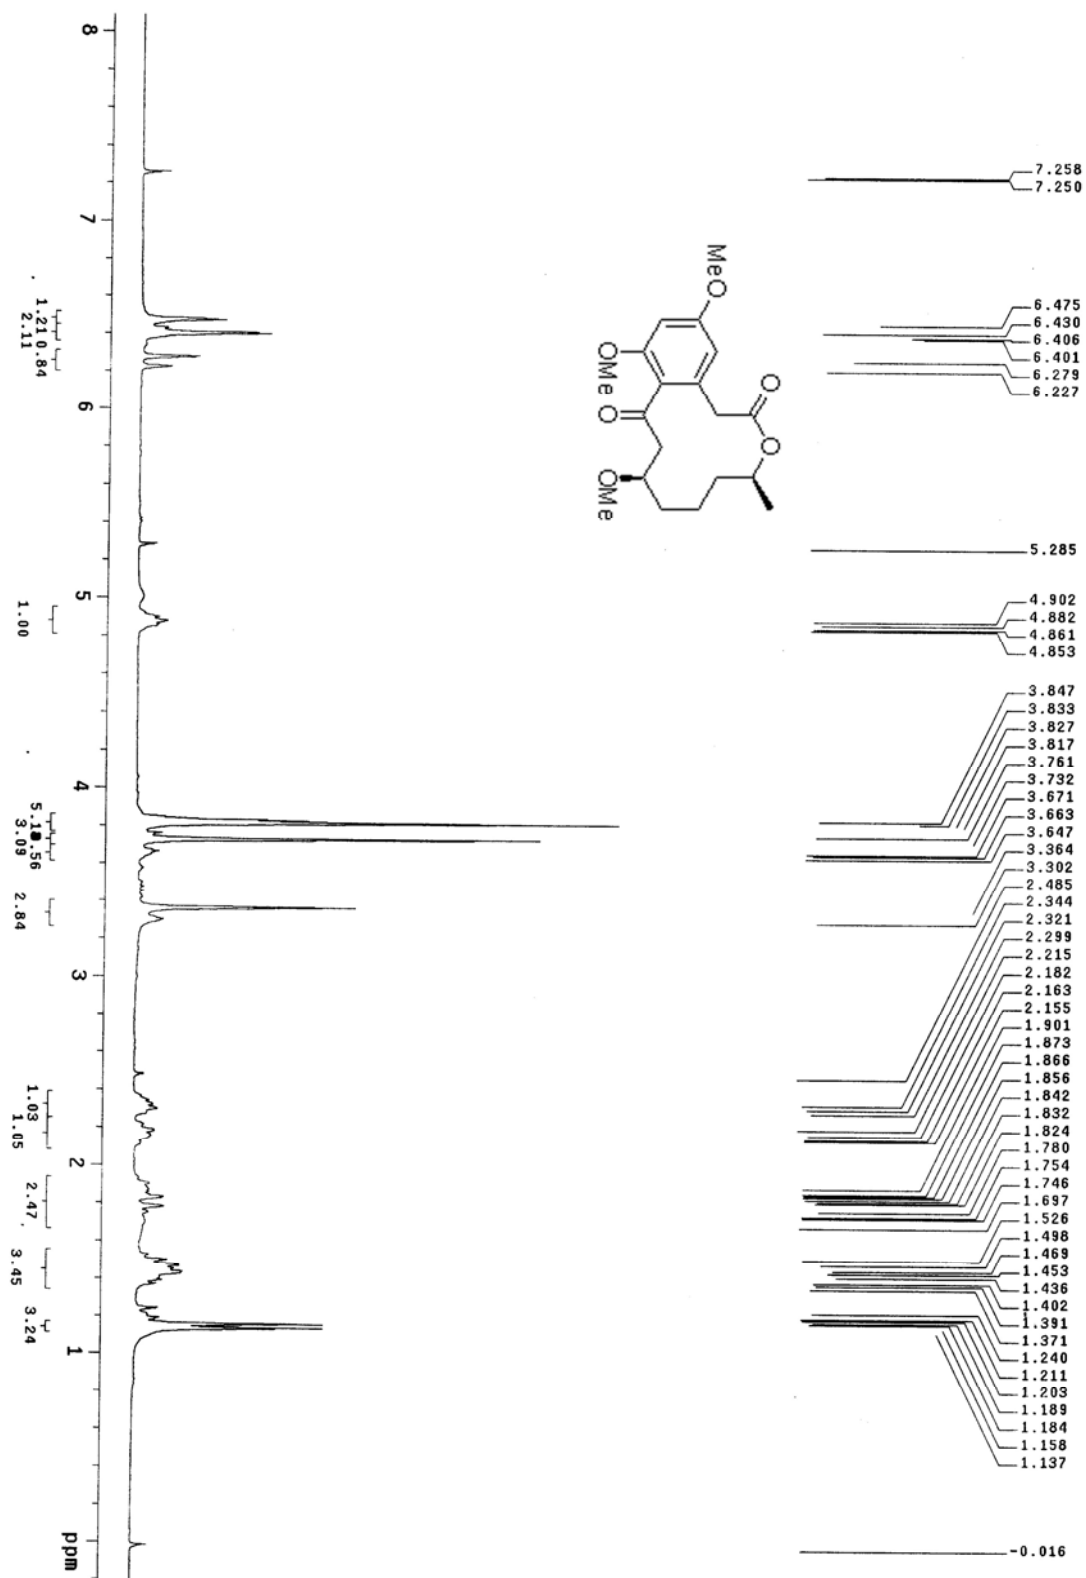

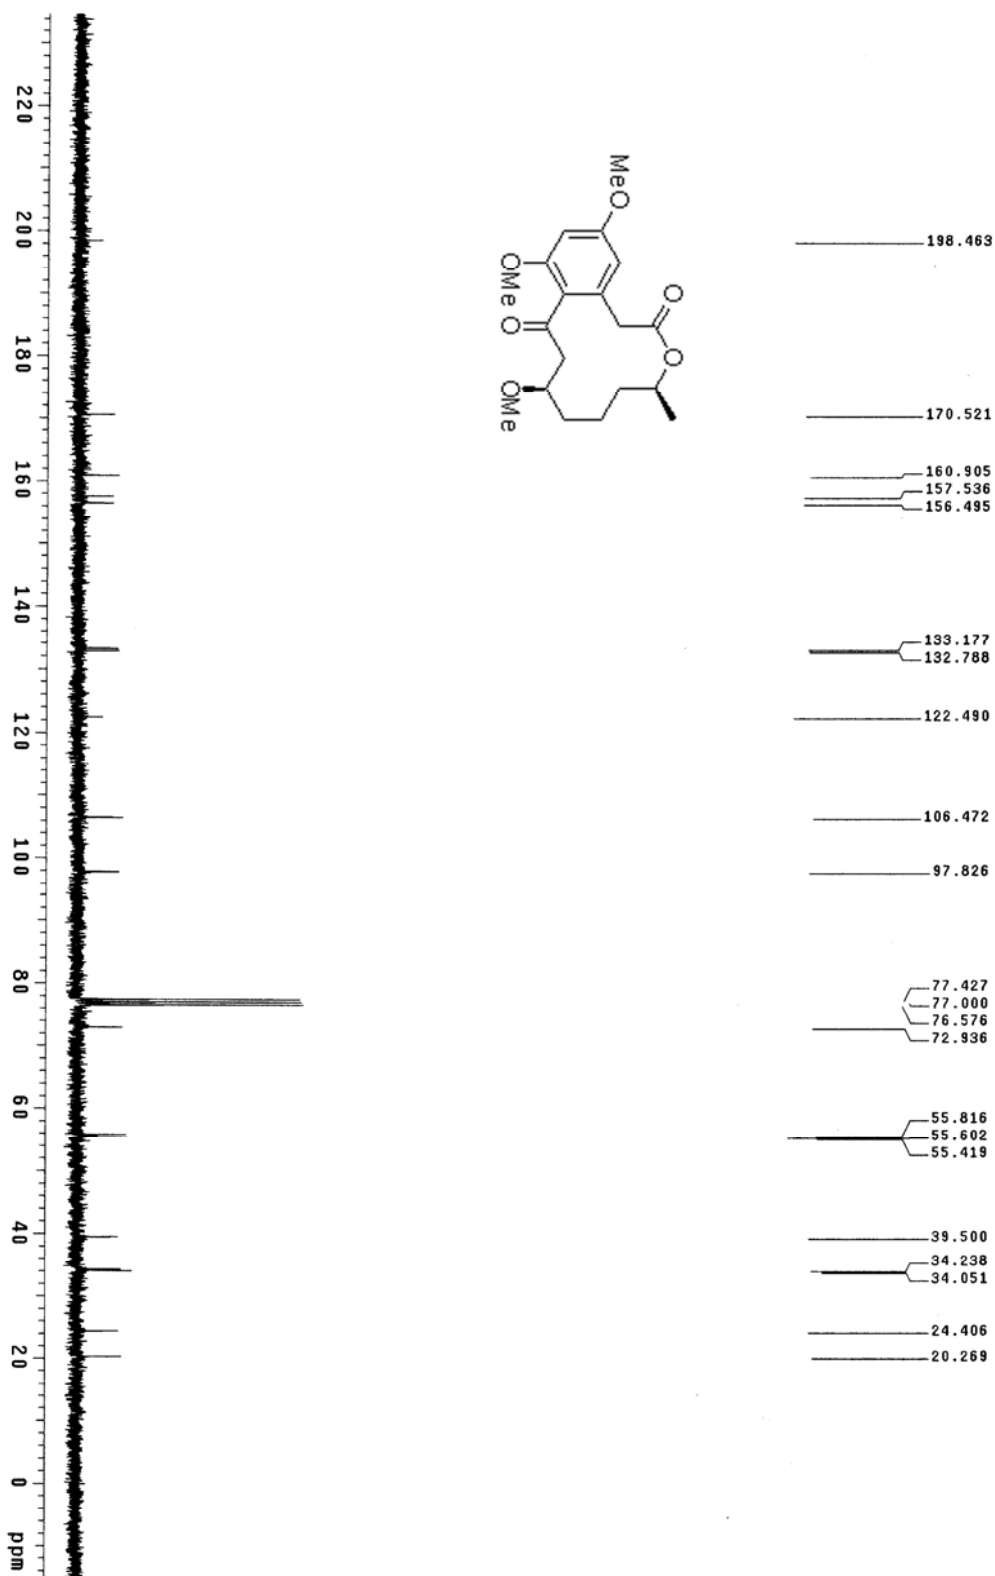

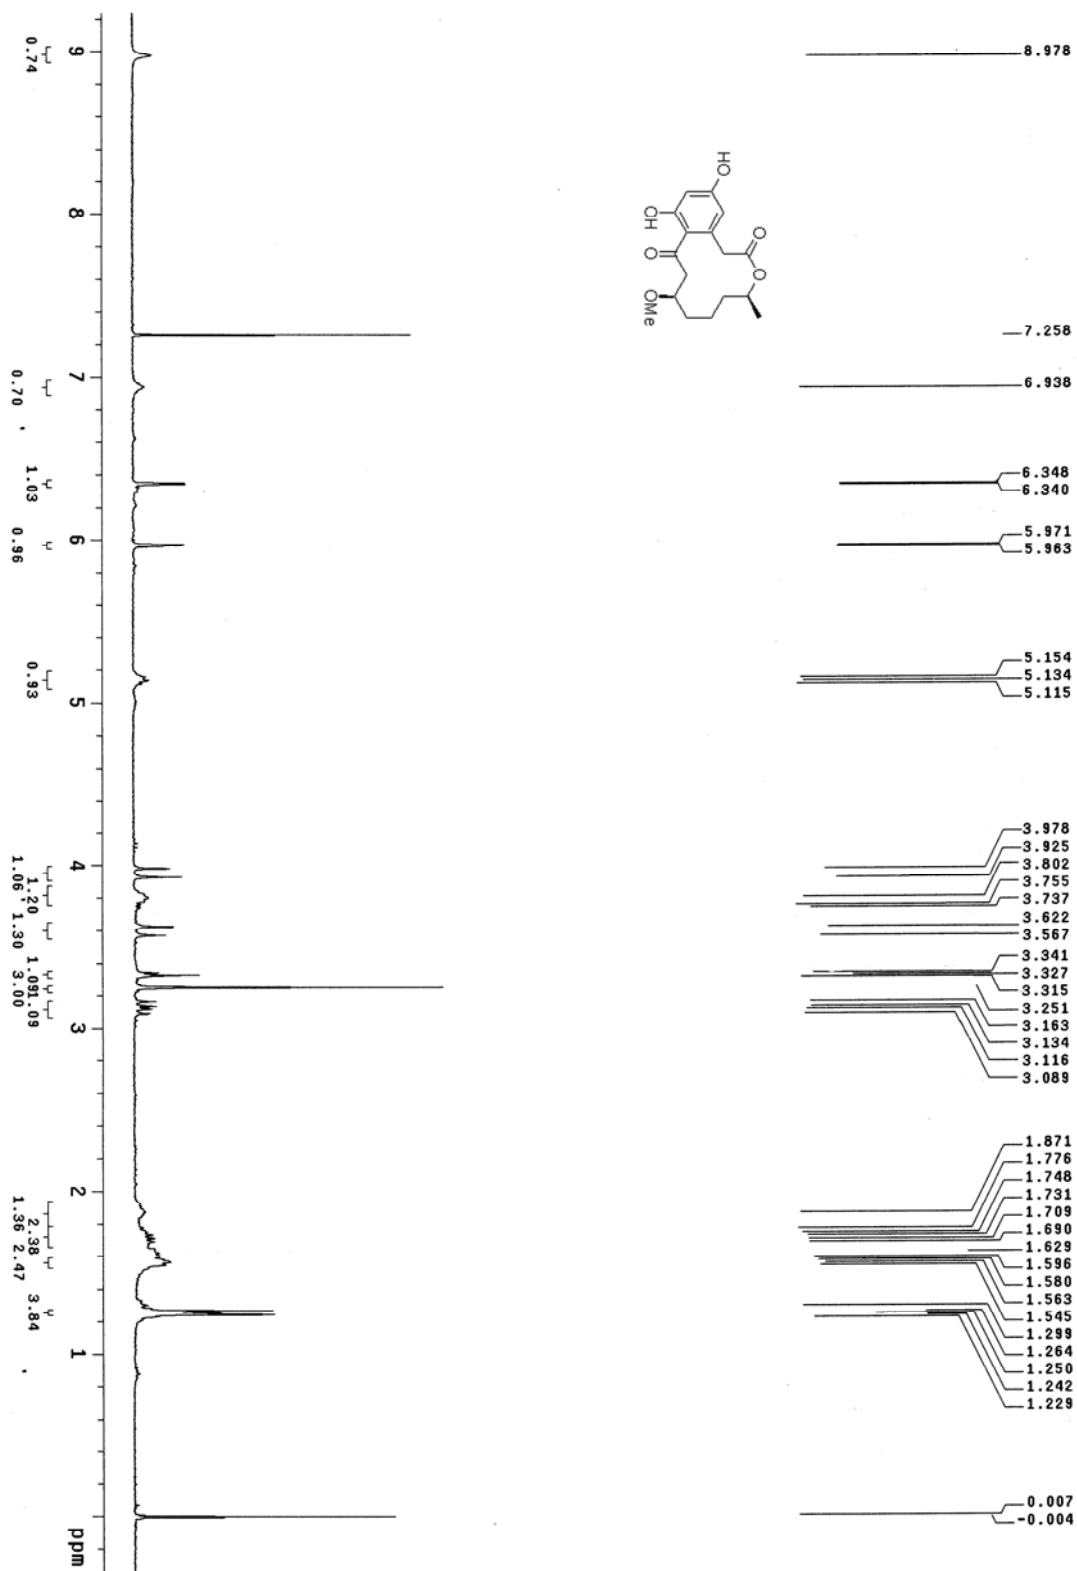

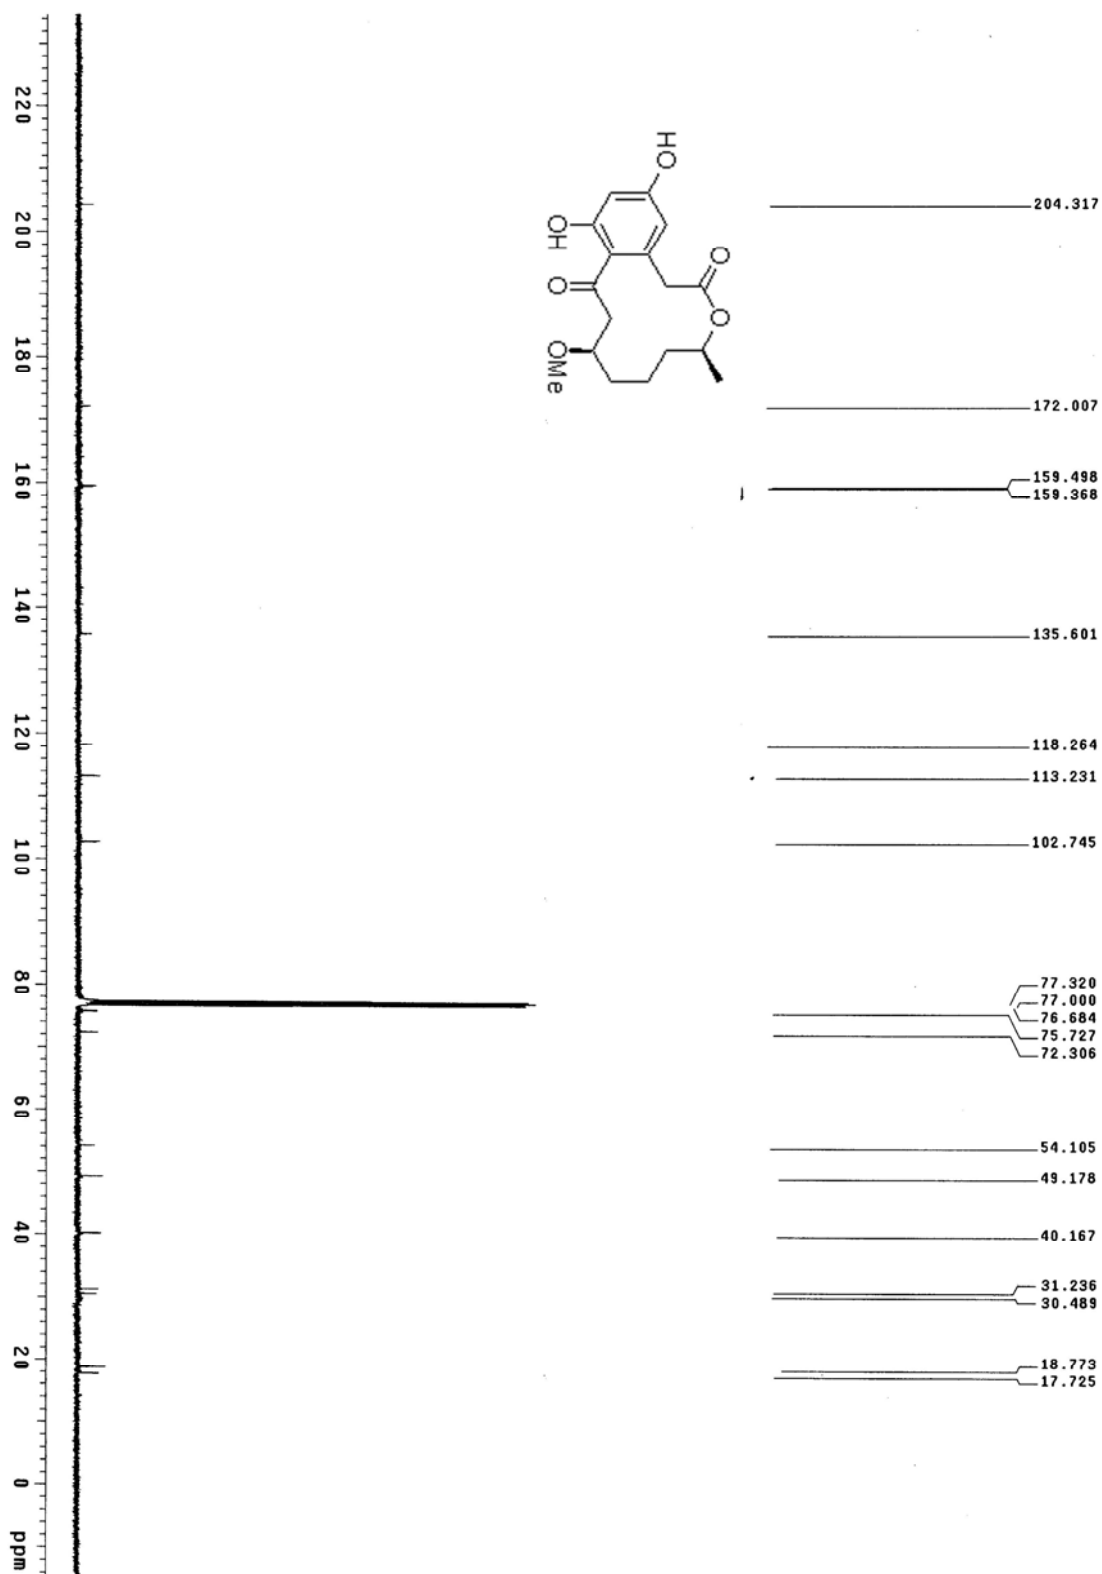

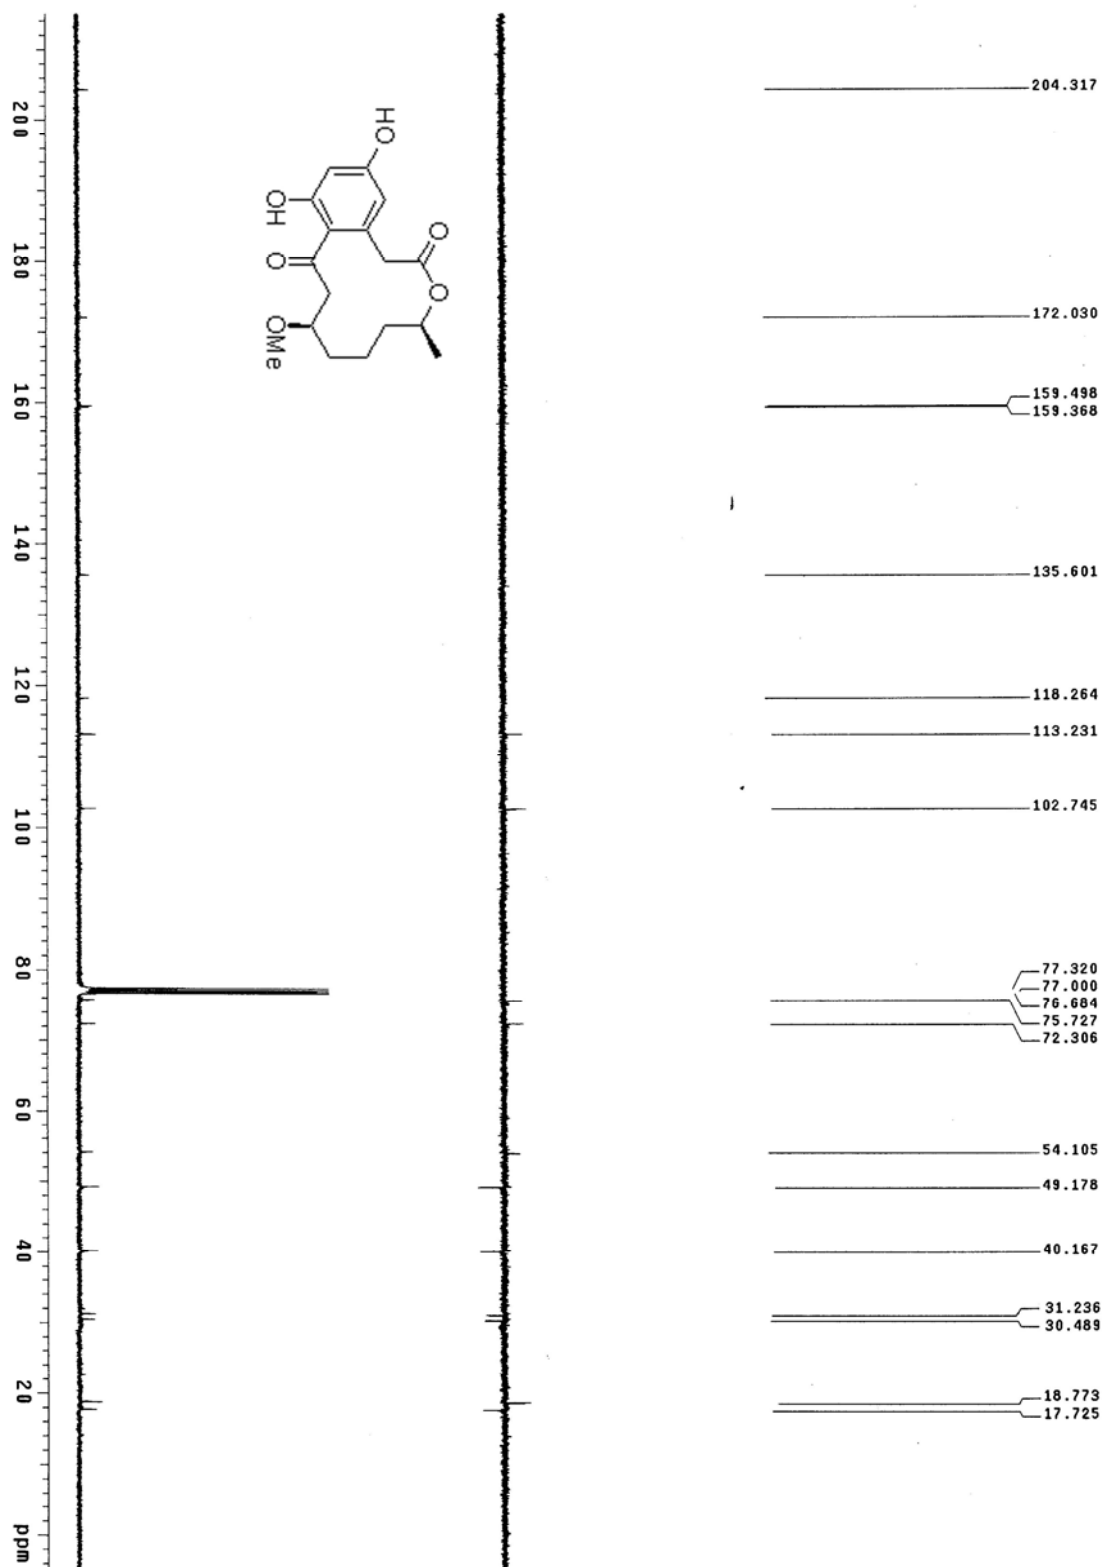

Supplement: Supplementary file 1 [file 4669426]
